# Supplementary material for: A recyclable Cu@C2N nano-catalyst applied in the transformation of alkynes: pH switchable access to ketones and 1,3-diynes
Source: Royal Society of Chemistry journal article supplement (doi:10.1039/d3gc04314b), 2024-01-01
Supplement: d3gc04314b1.pdf [file d3gc04314b1.pdf]

## Supporting Information

# Recyclable Cu@C<sub>2</sub>N Nano-catalyst Applied in the Transformation of Alkynes: pH Switchable Access to Ketones and 1,3-Diynes

Yuanjin Li,<sup>‡a</sup> Tianyu Yang,<sup>‡a</sup> Shuhui Wang,<sup>‡b</sup> Zuqiang Bian,<sup>\*a</sup> Zhiwei Liu<sup>\*a</sup>

<sup>a</sup> Beijing National Laboratory for Molecular Sciences, State Key Laboratory of Rare Earth Materials Chemistry and Applications, College of Chemistry and Molecular Engineering, Peking University, Beijing 100871, China. E-mail: bianzq@pku.edu.cn, zwliu@pku.edu.cn

<sup>b</sup> Fujian Key Laboratory of Agricultural Information Sensing Technology, College of Mechanical and Electrical Engineering, Fujian Agriculture and Forestry University, Fuzhou, Fujian 350002, China

<sup>‡</sup> These authors have contributed equally

## Experimental Section

### Chemicals

Hexaketocyclohexane octahydrate ( $\text{HKH}\cdot 8\text{H}_2\text{O}$  ( $\geq 95\%$ )) was purchased from HEOWNS (Tianjin, China), copper chloride dihydrate ( $\text{CuCl}_2\cdot 2\text{H}_2\text{O}$  ( $\geq 99\%$ )) was purchased from Energy Chemical Company (Shanghai, China). Alkynes ( $\geq 98\%$ ) were purchased from Bidepharm Company (Shanghai, China). Formic acid, acetic acid, trifluoroacetic acid, sulfuric acid, propanoic acid, methanol, ethanol, 2,2,2-trifluoroethanol, ethyl acetate, tetrahydrofuran (THF), triethylamine, ethylenediamine, pyridine, aqueous ammonia, tert-butylamine, 4-dimethylaminopyridine (DMAP), isopropanol (IPA) and dichloromethane were purchased from Tianjin Med. Co. Ltd (Tianjin, China, analytical reagent (AR)). Hexaketocyclohexane octahydrate (HTB) was purchased from Tianjin HEOWNS Co. Ltd (Tianjin, China, analytical reagent (AR)). All chemicals were commercial purchased and used without further purification. Hexaaminobenzene (HAB) was prepared according to the literature: **Reference:** Mahmood, J. Kim, D. Jeon, I.-Y. Lah, M. Baek, J.-B. *Synthesis*. **2013**, *24*, 246. 1-Methyl-4-(prop-1-yn-1-yl)benzene, 1-chloro-4-(prop-1-yn-1-yl)benzene, but-1-yn-1-ylbenzene and pent-1-yn-1-ylbenzene were prepared according to the literature: **Reference:** Briones, J. F. Davies, H. M. L. *Org. Lett.* **2011**, *13*, 3984.

### Instrumentation

Transmission electron microscopy (TEM), dark-field scanning transmission electron microscopy (dark-field STEM), and energy dispersive spectrometer (EDS) characterizations were all carried out with a TECNAI G<sup>2</sup> TF20 instrument (200 kV, USA). The field-emission scanning electron microscopy (SEM) were performed on a Hitachi SU8010 instrument (10 kV, Japan). The X-ray photoelectron spectroscopy (XPS) were recorded at ESCALab250Xi spectrometer (USA). Crystalline patterns of the materials were identified by powder X-ray diffraction (PXRD) using Cu K $\alpha$

radiation ( $\lambda = 1.5418 \text{ \AA}$ ) (Bruker D8 Advance). The loading amount of Cu elements were determined by inductively coupled plasma optical emission spectrum (ICP-OES) (Agilent ICPOES730, USA). Diffuse reflectance infrared Fourier transform spectroscopy (DRIFTS) spectroscopy was performed on a Shimadzu UV2600 (Shimadzu, Japan). The  $\text{NH}_3/\text{CO}_2$ -TPD were measured by Xianquan TP-5080 (Tianjing Xianquan, China).  $^1\text{H-NMR}$  (400 MHz),  $^{13}\text{C-NMR}$  (100 MHz) and  $^{19}\text{F-NMR}$  (376 MHz) spectra were determined on Bruker Avance III 400 MHz NMR.

### **Synthesis of Cu@C<sub>2</sub>N**

For the preparation of Cu@C<sub>2</sub>N, HAB·3HCl (2 mmol), HTB·8H<sub>2</sub>O (2 mmol) and CuCl<sub>2</sub>·2H<sub>2</sub>O (4 mmol) were mixed in 20 mL of acetic acid/ethanol (1:1) and refluxed at 120 °C for 4 h. After cooled to room temperature, the precipitate was removed by centrifugation. Afterward, 100 mL of H<sub>2</sub>O was added to the supernatant and allowed to stand overnight. The resulting precipitate was centrifugated, washed with H<sub>2</sub>O/ethanol (1/1), and then freeze-dried at -50 °C under reduced pressure (<100 Pa) for 24 h.

### **Catalytic activity evaluation**

#### **Hydration Reaction**

Method a: 10 mg as-prepared heterogeneous catalyst (the containing Cu amount was confirmed by ICP-OES) were mixed with 0.5 mmol alkynes and 0.5 mL H<sub>2</sub>O in 2 mL HCOOH. After stirring at 60 °C for 2 h, the catalyst was removed by centrifugation. The product was purified by flash chromatography (silica gel, hexane/EtOAc, 5:1,  $R_f = 0.5$ ) to give ketones compounds **2**.

Method b: 10 mg as-prepared heterogeneous catalyst (the containing Cu amount was confirmed by ICP-OES) were mixed with 0.5 mmol alkynes, 0.5 mL H<sub>2</sub>O and 0.5 mL concentrated H<sub>2</sub>SO<sub>4</sub> in 2 mL CF<sub>3</sub>CH<sub>2</sub>OH. After stirring at 90 °C for 2 h, the catalyst

was removed by centrifugation. The product was purified by flash chromatography (silica gel, hexane/EtOAc, 5:1,  $R_f = 0.5$ ) to give ketones compounds **2**.

### **Homo-coupling Reaction**

Method a: 20 mg as-prepared heterogeneous catalyst (the containing Cu amount was confirmed by ICP-OES) were mixed with 0.5 mmol alkynes and 1 mol% Et<sub>3</sub>N in 1 mL H<sub>2</sub>O. After stirring at 80 °C for 4 h, the catalyst was removed by centrifugation. The product was purified by flash chromatography (silica gel, hexane,  $R_f = 0.6$ ) to give symmetrical 1,3-diyne compounds **3**.

Method b: 20 mg as-prepared heterogeneous catalyst (the containing Cu amount was confirmed by ICP-OES) were mixed with 0.5 mmol alkynes and 1 mol% Et<sub>3</sub>N in 1 mL IPA/H<sub>2</sub>O (1:1). After stirring at 80 °C for 4 h, the catalyst was removed by centrifugation. The product was purified by flash chromatography (silica gel, hexane,  $R_f = 0.6$ ) to give symmetrical 1,3-diyne compounds **3**.

### **Hetero-coupling Reaction**

20 mg as-prepared heterogeneous catalyst (the containing Cu amount was confirmed by ICP-OES) were mixed with 0.5 mmol phenylacetylene, 0.1 mmol alkynes and 1 mol% Et<sub>3</sub>N in 1 mL IPA/H<sub>2</sub>O (1:1). After stirring at 80 °C for 4 h, the catalyst was removed by centrifugation. The product was purified by flash chromatography (silica gel, hexane,  $R_f = 0.6$ ) to give unsymmetrical 1,3-diyne compounds **4**.

## Supporting Figures

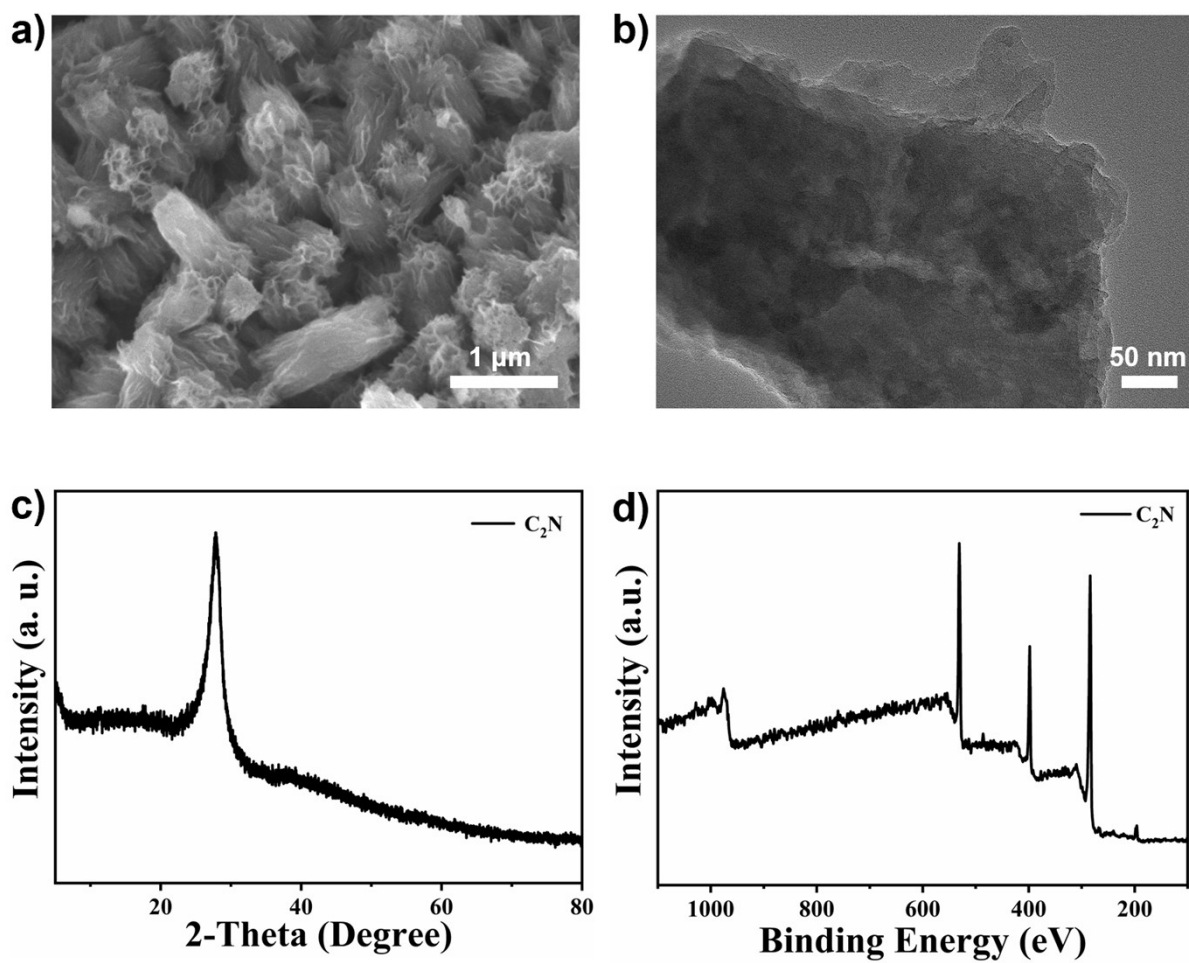

**Figure S1.** (a) The SEM images of  $C_2N$ . (b) The dark-field TEM image of  $C_2N$ . (c) Powder XRD patterns of  $C_2N$ . (d) XPS surveys of  $C_2N$ .

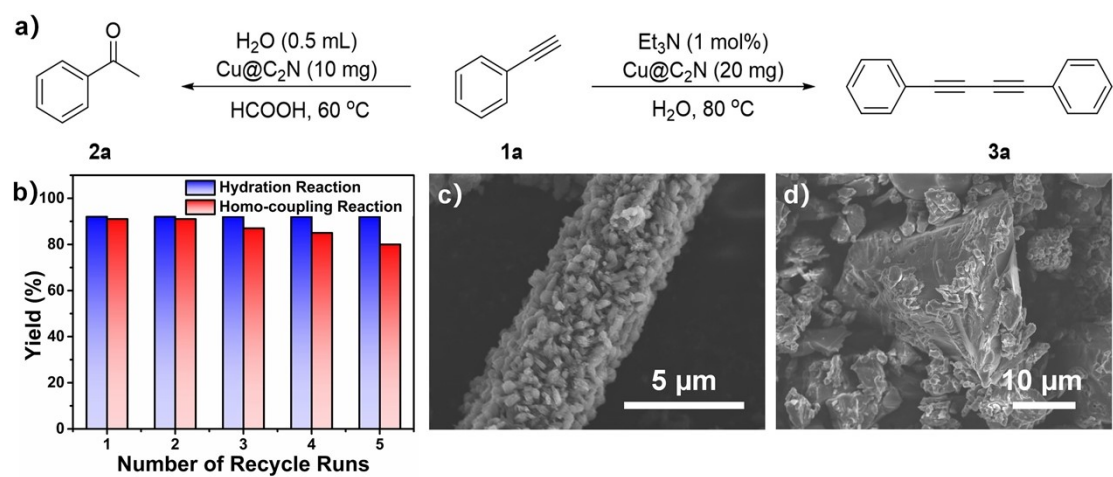

**Figure S2.** (a) The cyclic model reaction. (b) Catalytic performance of Cu@C<sub>2</sub>N catalyst during five cycles. (c) The SEM image of Cu@C<sub>2</sub>N after five recycling hydration reactions. (d) The SEM image of Cu@C<sub>2</sub>N after five recycling homo-coupling reactions.

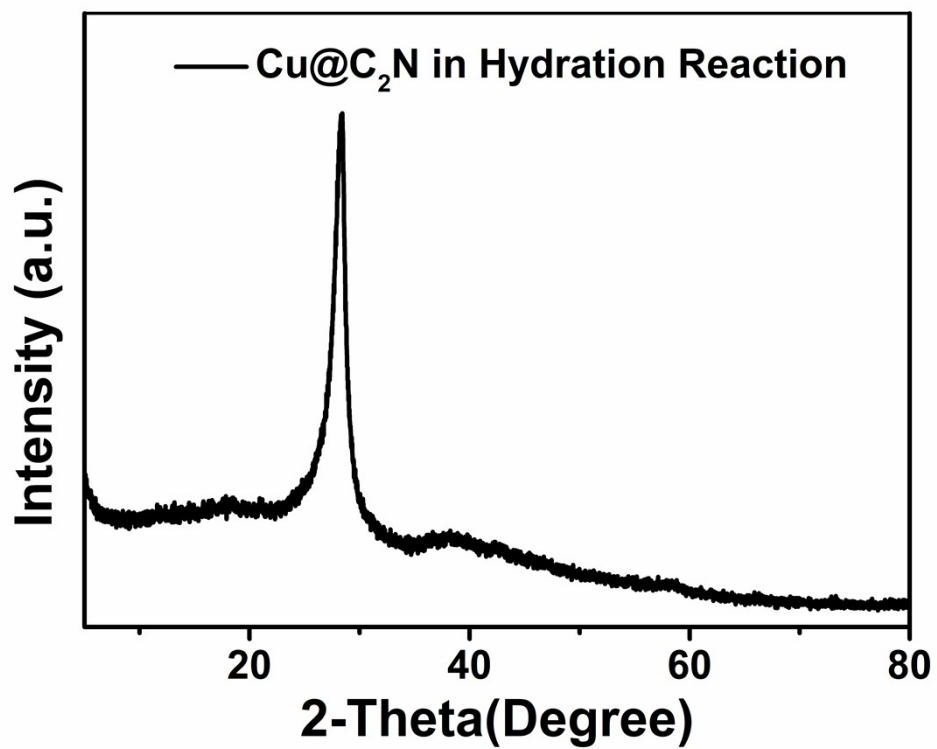

**Figure S3.** Powder XRD patterns of Cu@C<sub>2</sub>N after five catalytic cycles (Hydration Reaction).

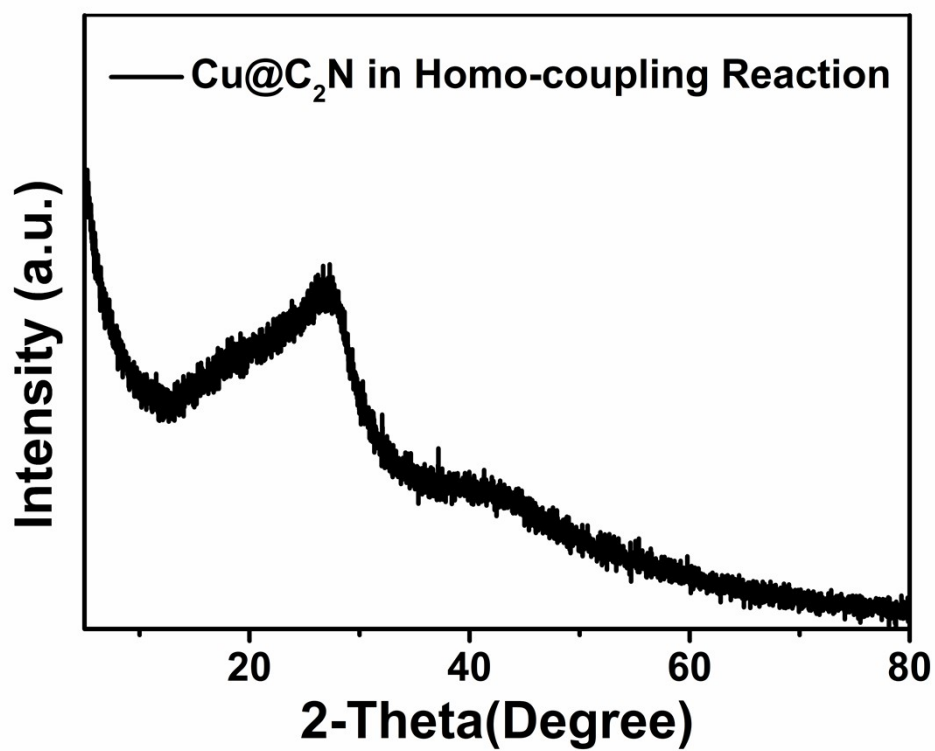

**Figure S4.** Powder XRD patterns of Cu@C<sub>2</sub>N after five catalytic cycles (Homo-coupling Reaction).



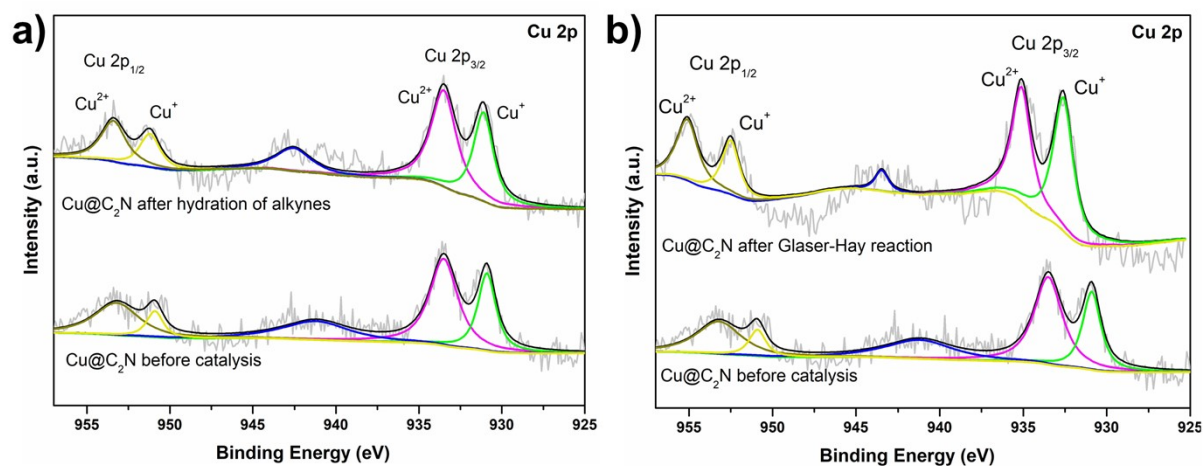

**Figure S5.** (a) XPS Cu 2p spectra of Cu@C<sub>2</sub>N before and after hydration reaction. (b) XPS Cu 2p spectra of Cu@C<sub>2</sub>N before and after Glaser-Hay reaction.

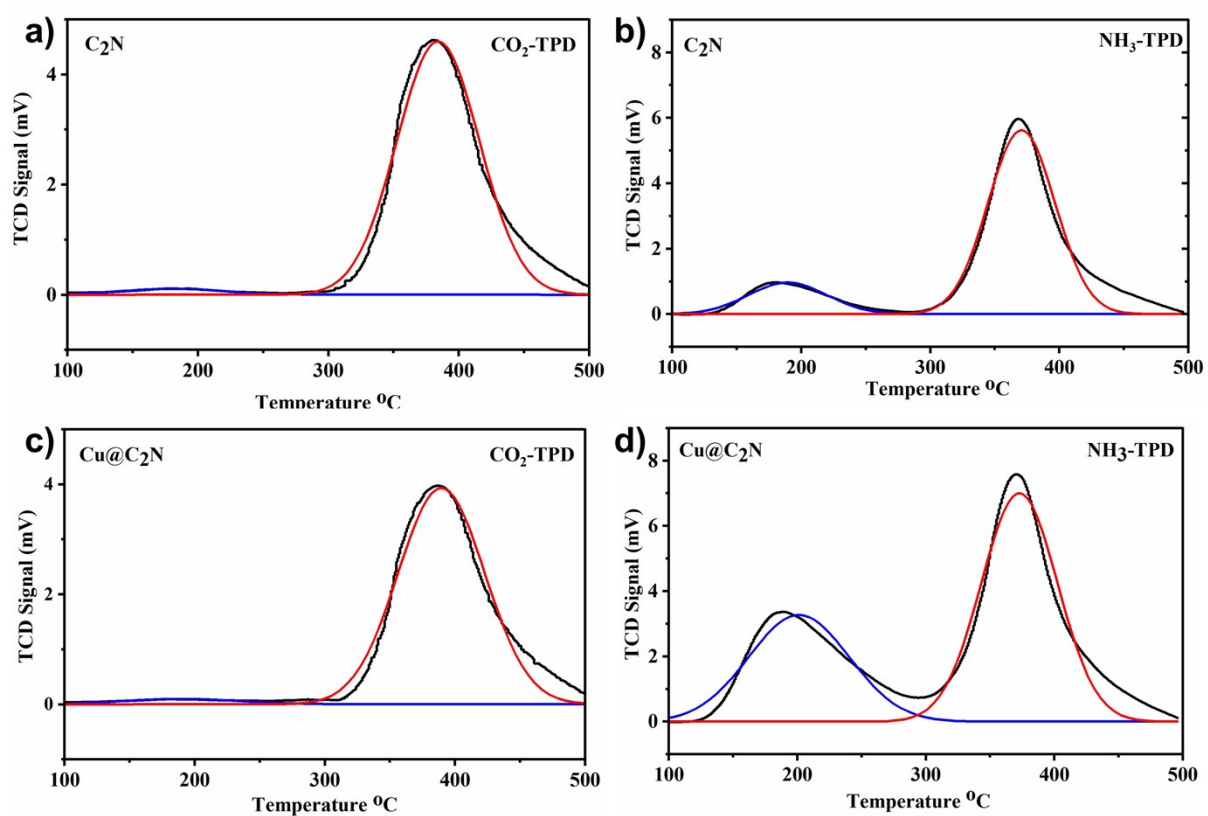

**Figure S6.** (a-b) Temperature-programmed desorption of CO<sub>2</sub> (a) and NH<sub>3</sub> (b) on C<sub>2</sub>N. (c-d) Temperature-programmed desorption of CO<sub>2</sub> (c) and NH<sub>3</sub> (d) on Cu@C<sub>2</sub>N.

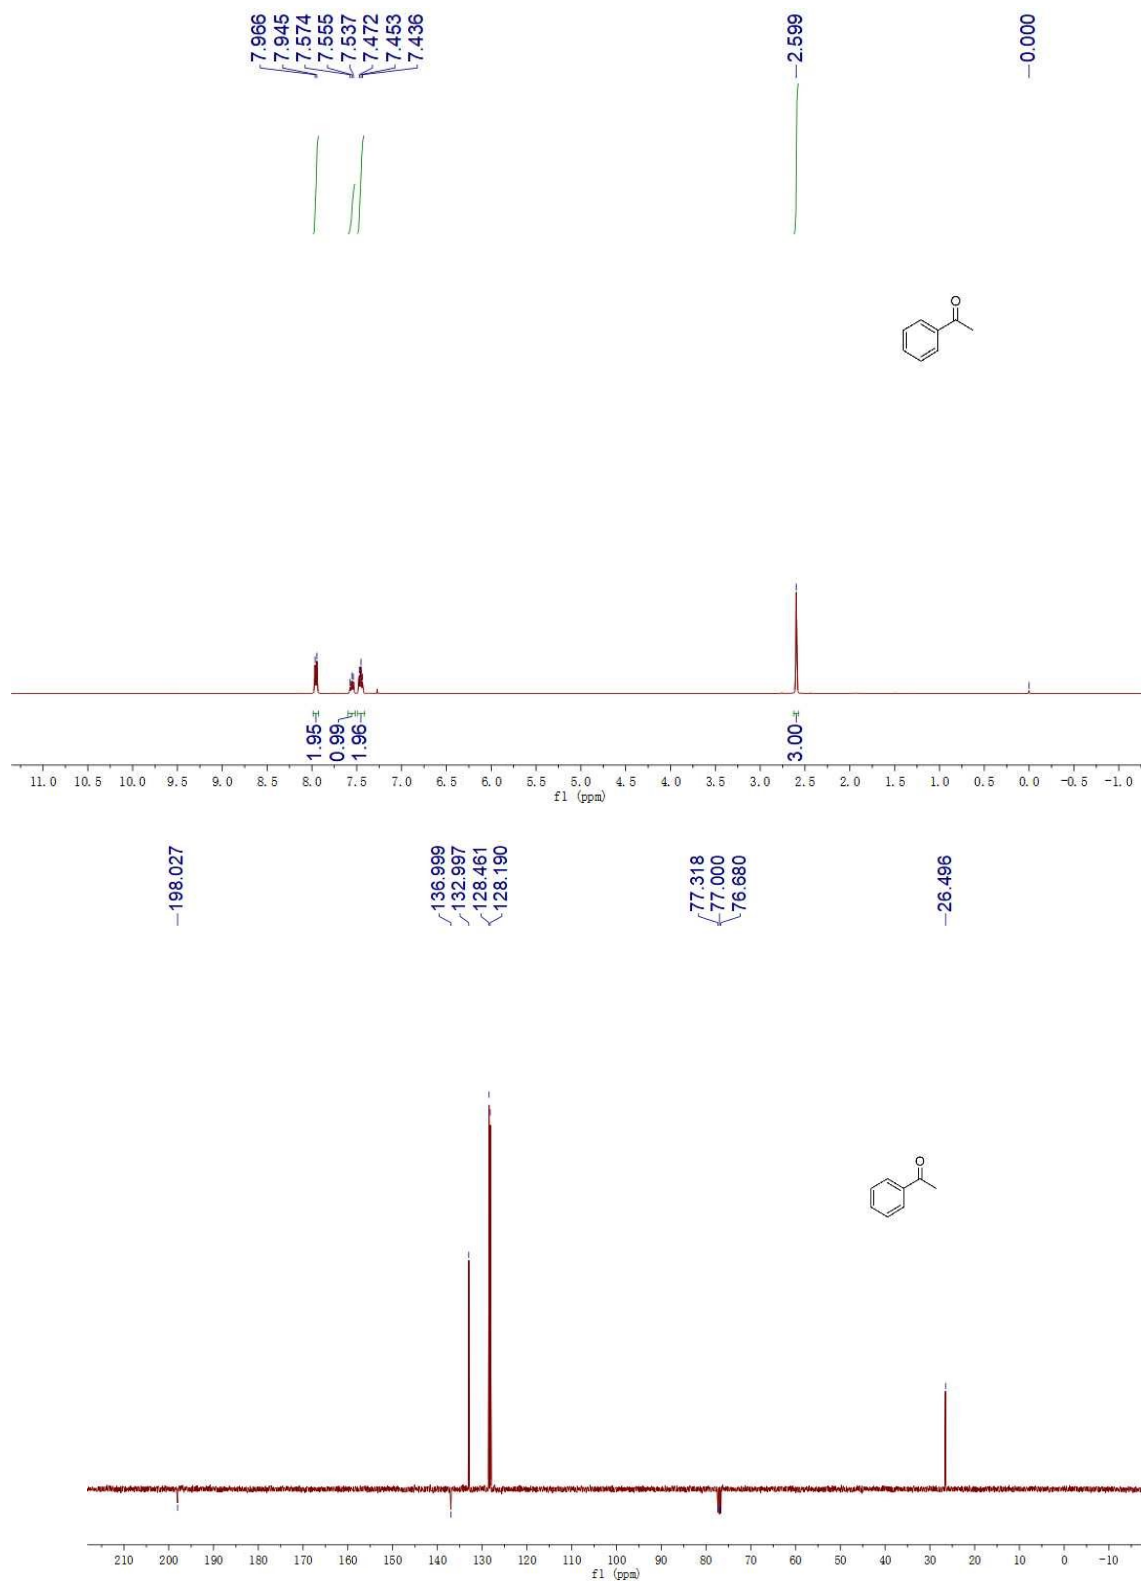

**Figure S7.**  $^1\text{H}$  and  $^{13}\text{C}$  NMR spectra of acetophenone (**2a**).  $^1\text{H}$  NMR (400 MHz,  $\text{CDCl}_3$ ):  $\delta$  7.96 (d,  $J = 8.4$  Hz, 2H), 7.56 (t,  $J = 7.6$  Hz, 1H), 7.45 (t,  $J = 7.6$  Hz, 2H), 2.60 (s, 3H).  $^{13}\text{C}$  NMR (100 MHz,  $\text{CDCl}_3$ ):  $\delta$  198.0, 137.0, 133.0, 128.5, 128.1, 26.5.

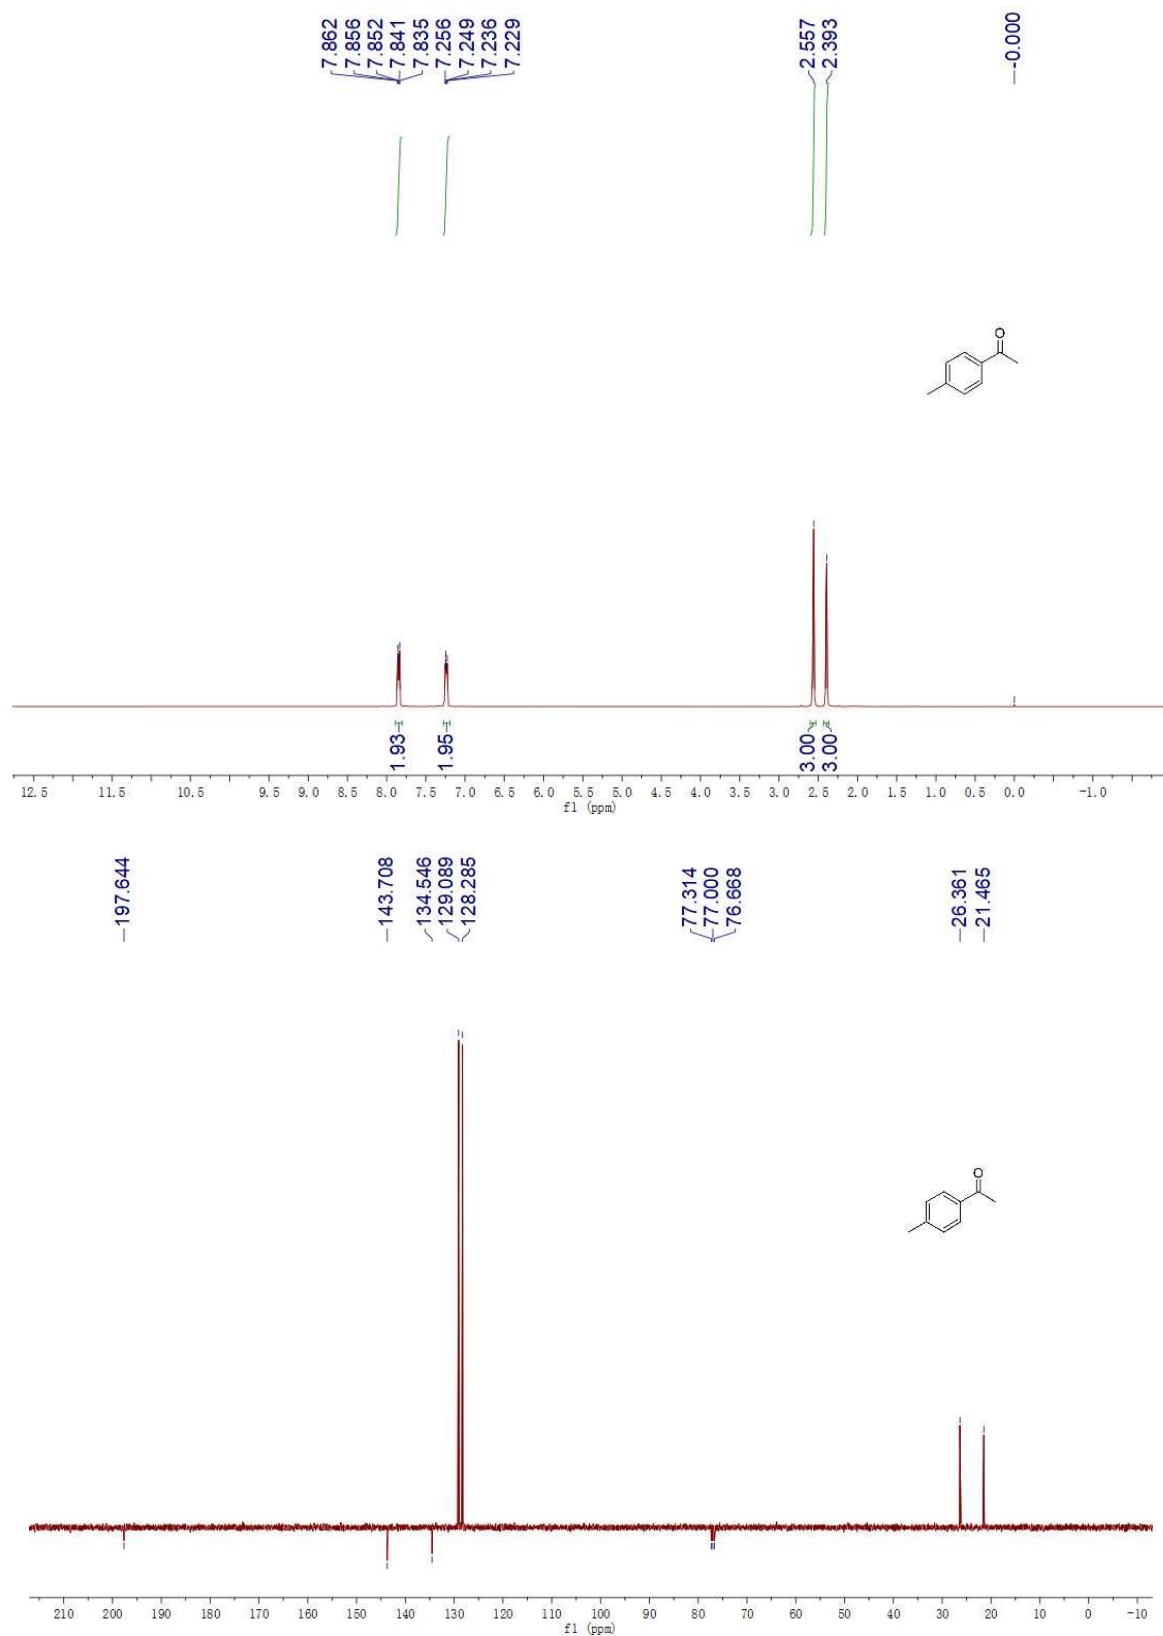

**Figure S8.** <sup>1</sup>H and <sup>13</sup>C NMR spectra of 1-(*p*-tolyl)ethan-1-one (**2b**). <sup>1</sup>H NMR (400 MHz, CDCl<sub>3</sub>): δ 7.86-7.84 (m, 2H), 7.26-7.23 (m, 2H), 2.56 (s, 3H), 2.39 (s, 3H). <sup>13</sup>C NMR (100 MHz, CDCl<sub>3</sub>): δ 197.6, 143.7, 134.5, 129.1, 128.2, 26.4, 21.5.

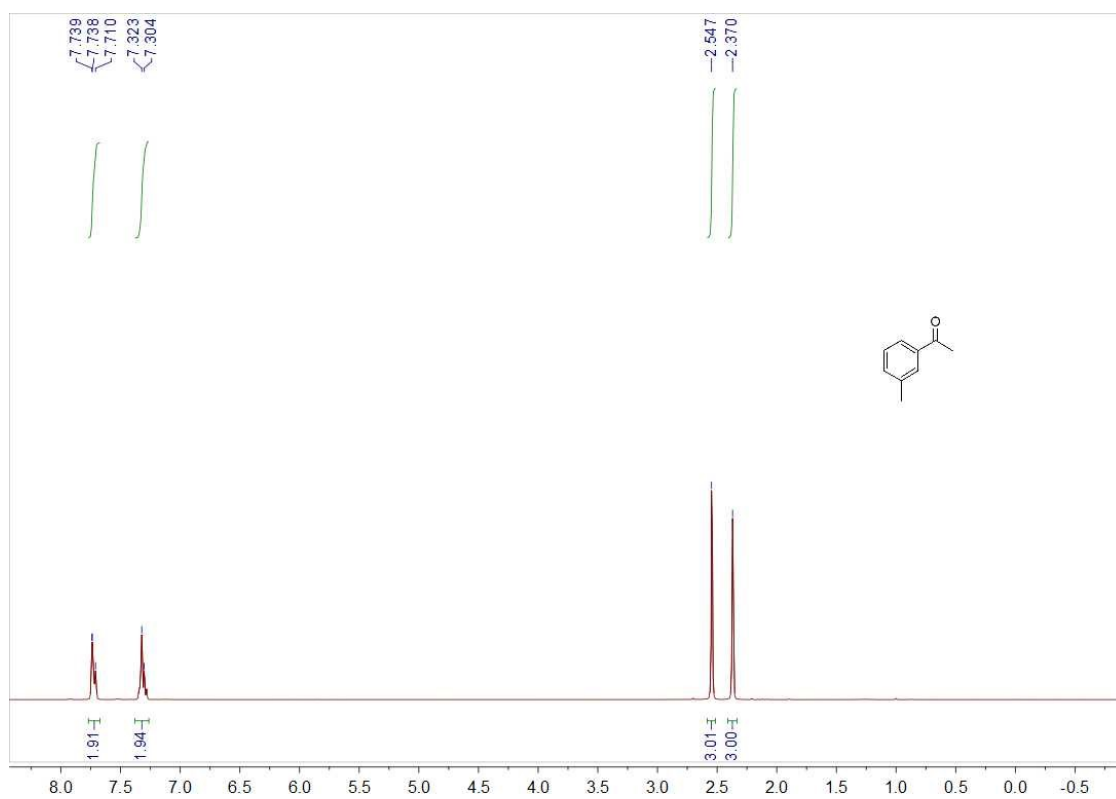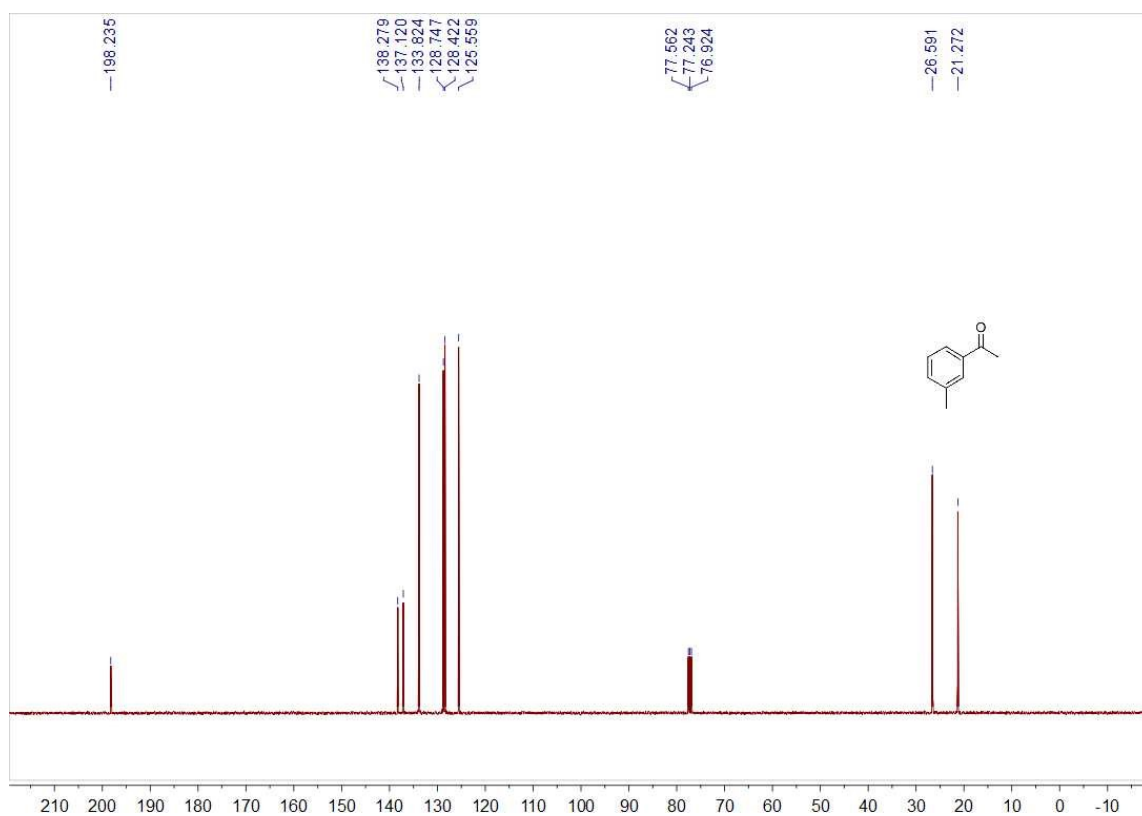

**Figure S9.** <sup>1</sup>H and <sup>13</sup>C NMR spectra of 1-(*m*-tolyl)ethan-1-one (**2c**). <sup>1</sup>H NMR (400 MHz, CDCl<sub>3</sub>): δ 7.74-7.71 (m, 2H), 7.32-7.30 (m, 2H), 2.55 (s, 3H), 2.37 (s, 3H). <sup>13</sup>C NMR (100 MHz, CDCl<sub>3</sub>): δ 198.24, 138.28, 137.12, 133.82, 128.75, 128.42, 125.56, 26.59, 21.27.

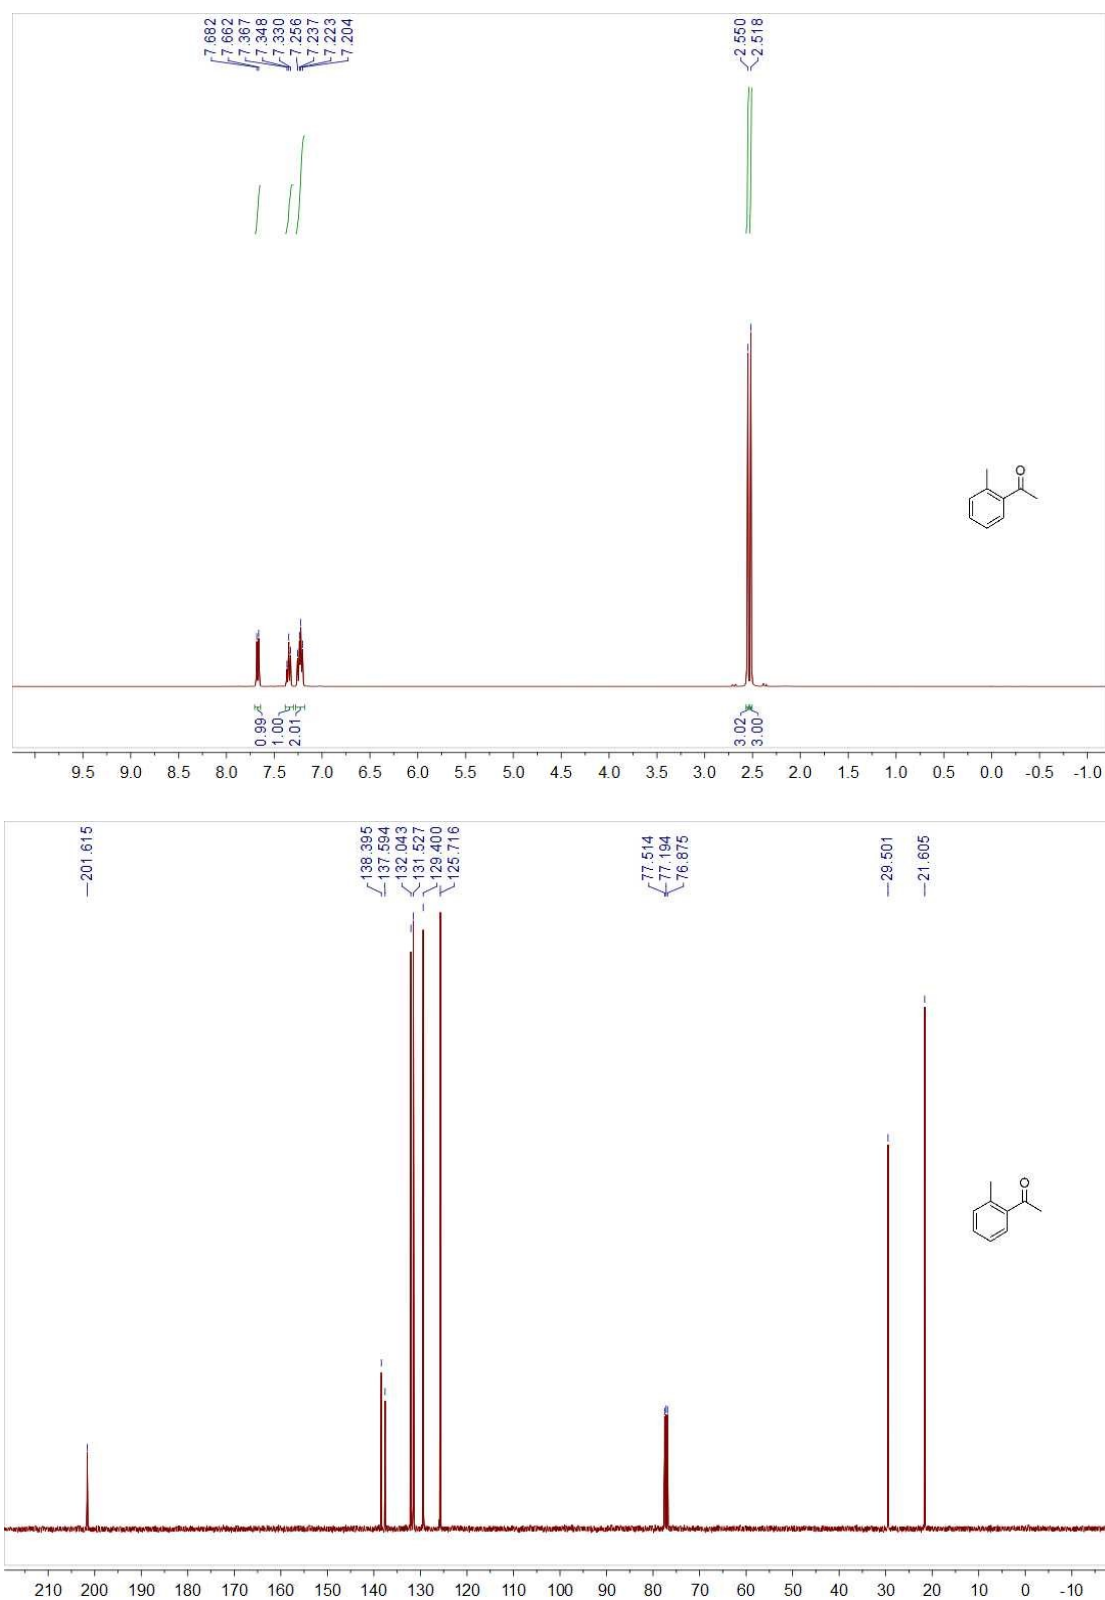

**Figure S10.**  $^1\text{H}$  and  $^{13}\text{C}$  NMR spectra of 1-(*o*-tolyl)ethan-1-one (**2d**).  $^1\text{H}$  NMR (400 MHz,  $\text{CDCl}_3$ ):  $\delta$  7.67 (d,  $J = 8.0$  Hz, 1H), 7.35 (t,  $J = 7.6$  Hz, 1H), 7.23 (q,  $J = 5.6$  Hz, 2H), 2.55 (s, 3H), 2.52 (s, 3H).  $^{13}\text{C}$  NMR (100 MHz,  $\text{CDCl}_3$ ):  $\delta$  201.62, 138.40, 137.59, 132.04, 131.53, 129.40, 125.72, 29.50, 21.61.

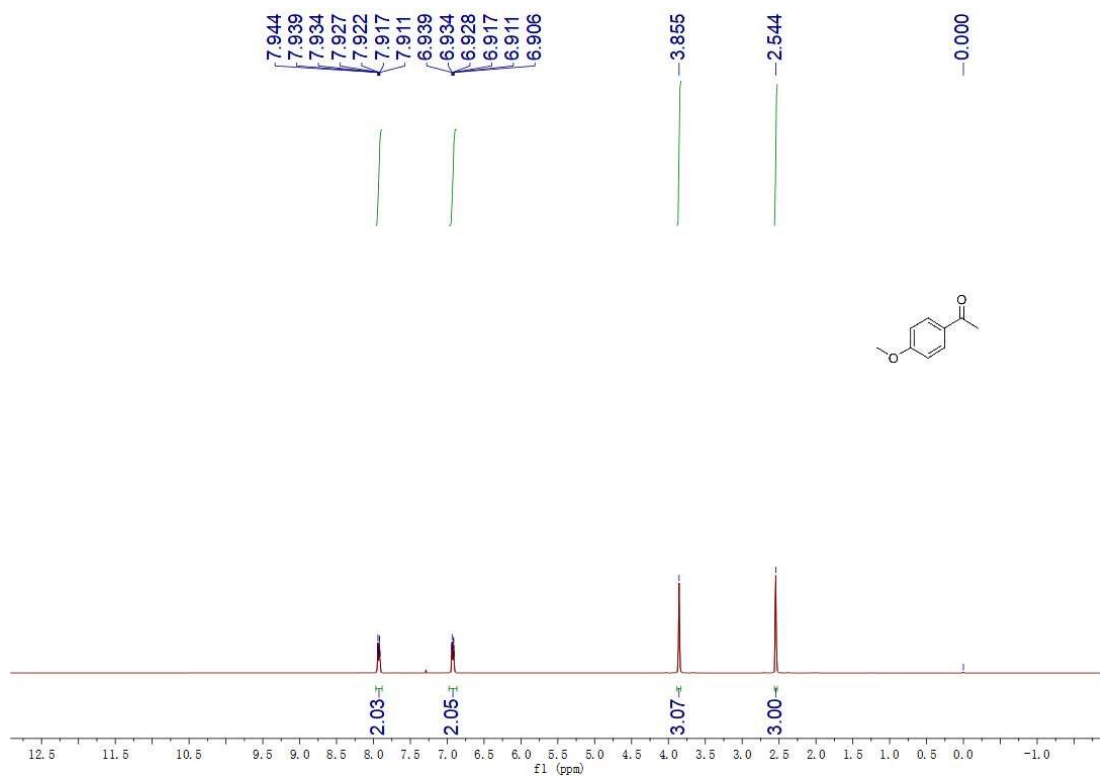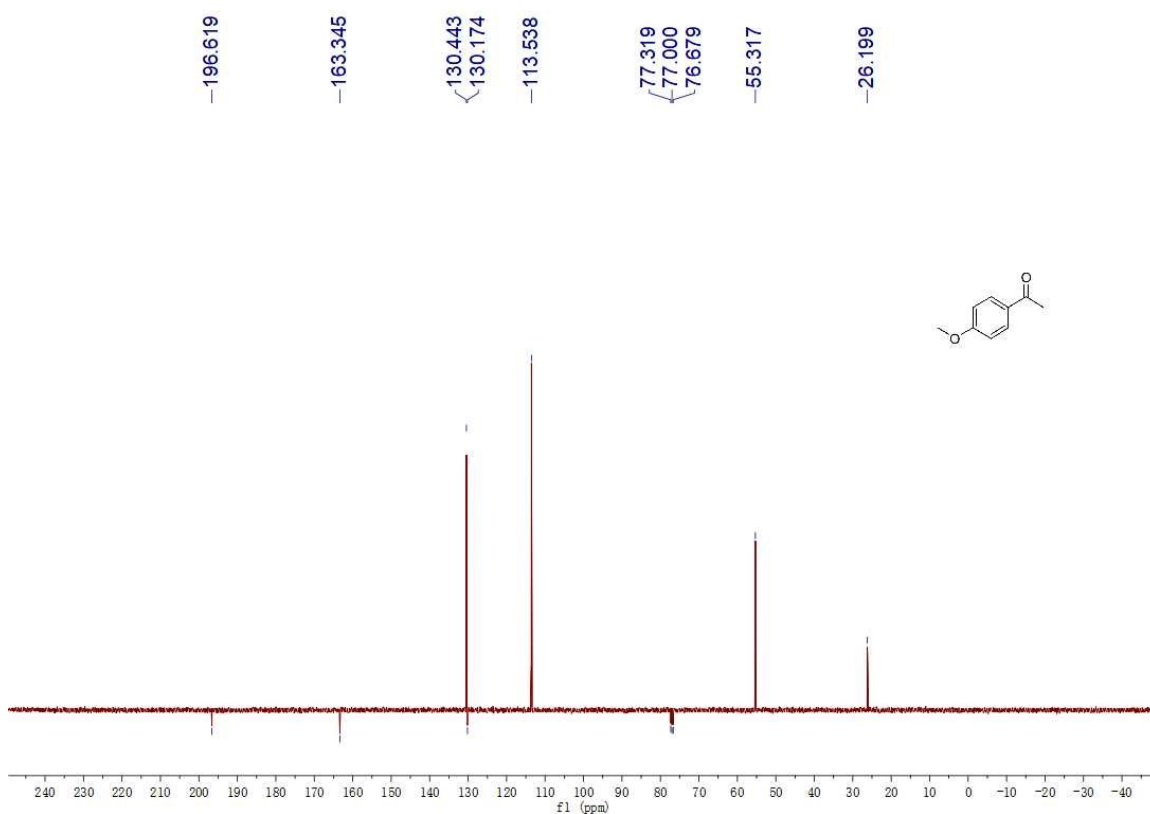

**Figure S11.**  $^1\text{H}$  and  $^{13}\text{C}$  NMR spectra of 1-(4-methoxyphenyl)ethan-1-one (**2e**).  $^1\text{H}$  NMR (400 MHz,  $\text{CDCl}_3$ ):  $\delta$  7.95-7.91 (m, 2H), 6.94-6.91 (m, 2H), 3.86 (s, 3H), 2.54 (s, 3H).  $^{13}\text{C}$  NMR (100 MHz,  $\text{CDCl}_3$ ):  $\delta$  196.6, 163.3, 130.4, 130.1, 113.5, 55.3, 26.2.

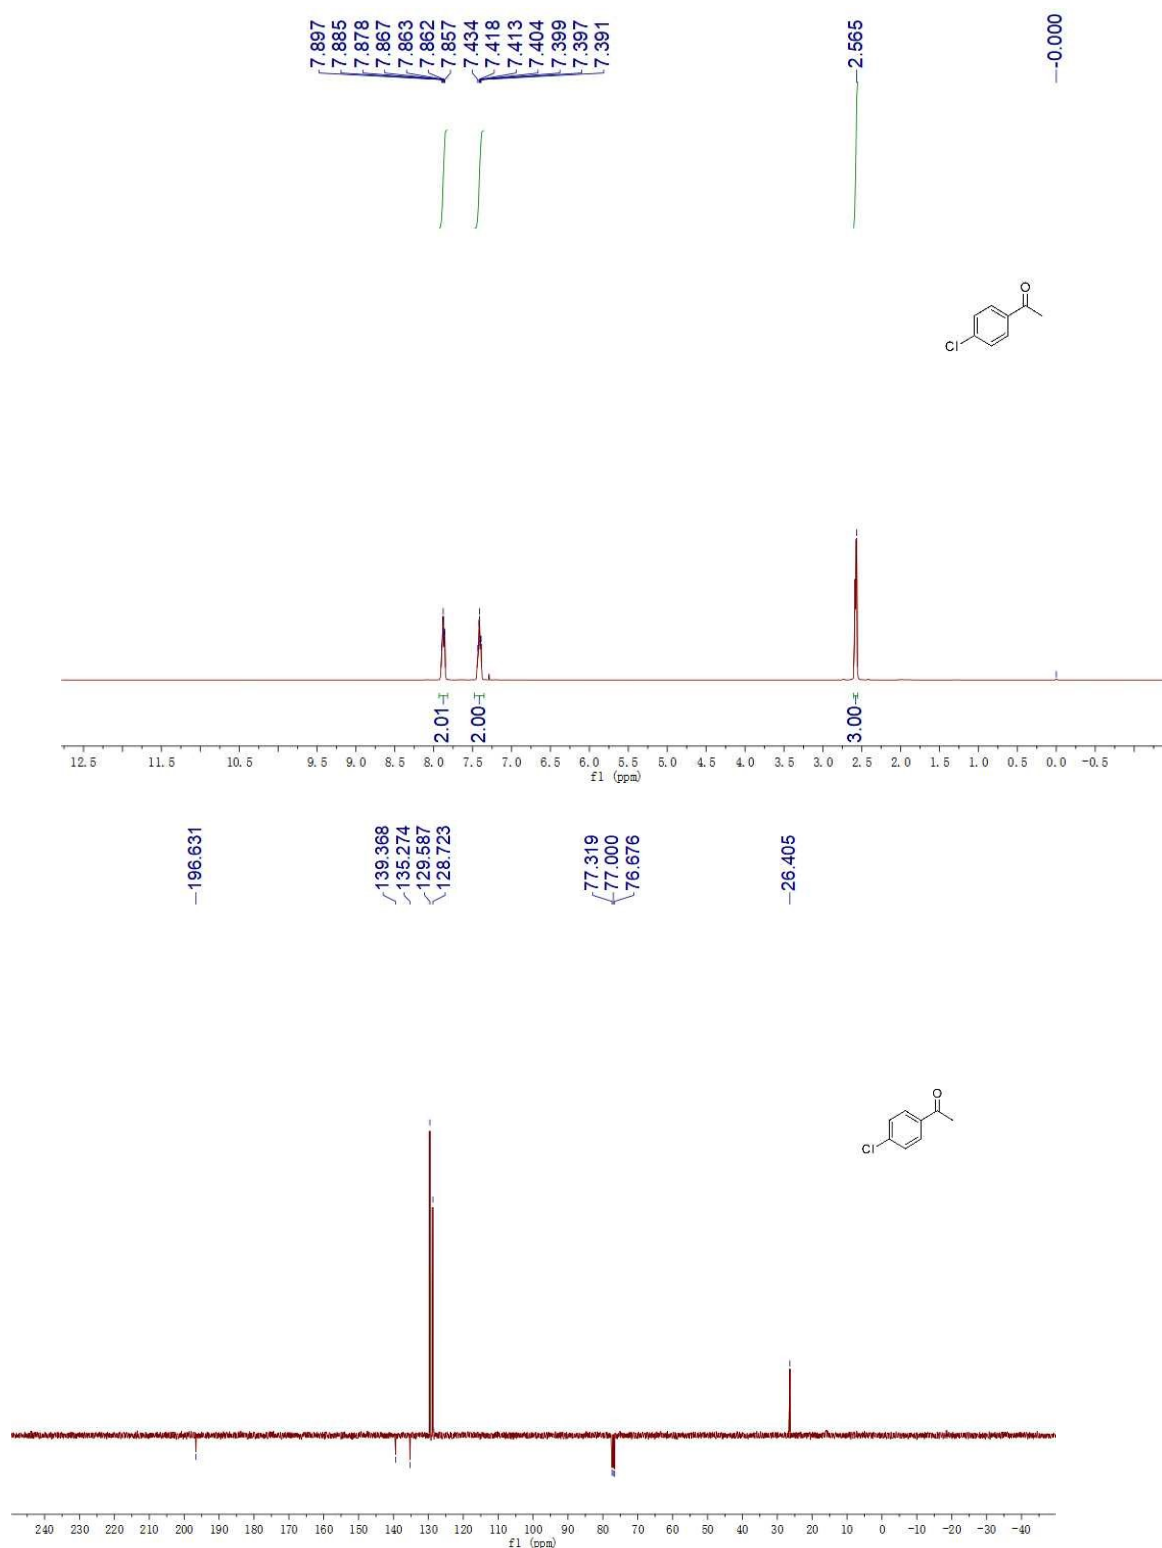

**Figure S12.**  $^1\text{H}$  and  $^{13}\text{C}$  NMR spectra of 1-(4-chlorophenyl)ethan-1-one (**2f**).  $^1\text{H}$  NMR (400 MHz,  $\text{CDCl}_3$ ):  $\delta$  7.90-7.86 (m, 2H), 7.43-7.39 (m, 1H), 2.57 (s, 3H).  $^{13}\text{C}$  NMR (100 MHz,  $\text{CDCl}_3$ ):  $\delta$  196.6, 139.4, 135.3, 129.6, 128.7, 26.4.



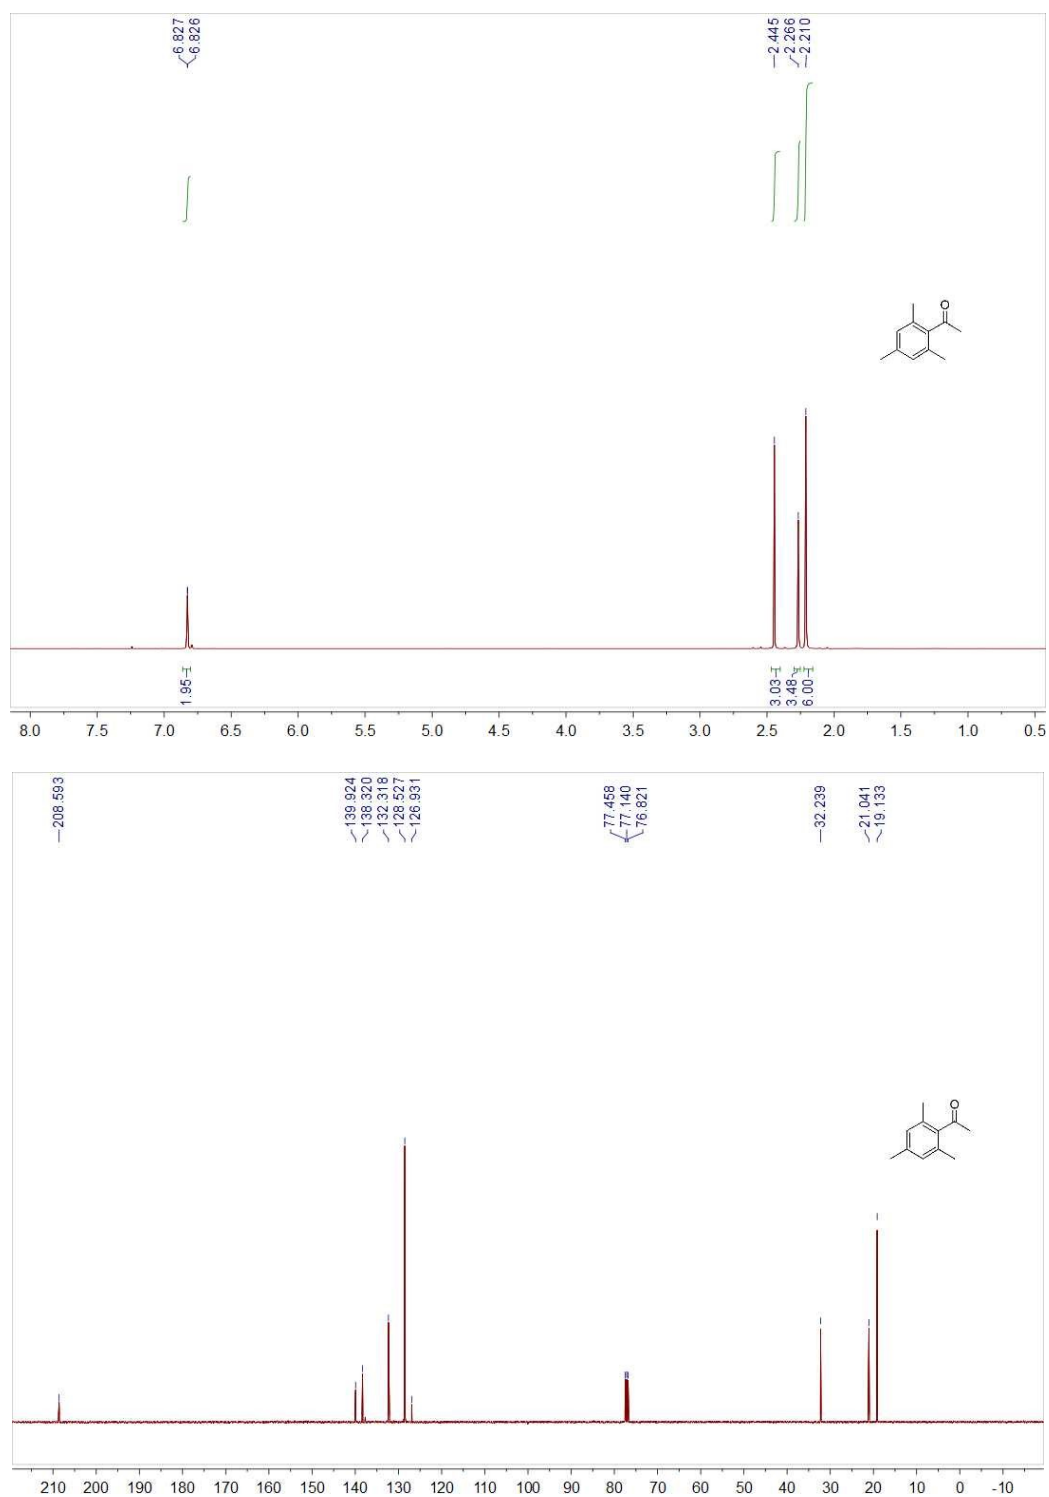

**Figure S13.**  $^1\text{H}$  and  $^{13}\text{C}$  NMR spectra of 1-(naphthalen-1-yl)ethan-1-one (**2g**).  $^1\text{H}$  NMR (400 MHz,  $\text{CDCl}_3$ ):  $\delta$  6.83 (s, 2H), 2.45 (s, 3H), 2.27 (s, 3H), 2.21 (s, 6H).  $^{13}\text{C}$  NMR (100 MHz,  $\text{CDCl}_3$ ):  $\delta$  208.6, 139.9, 138.3, 132.3, 128.5, 126.9, 32.2, 21.0, 19.1.

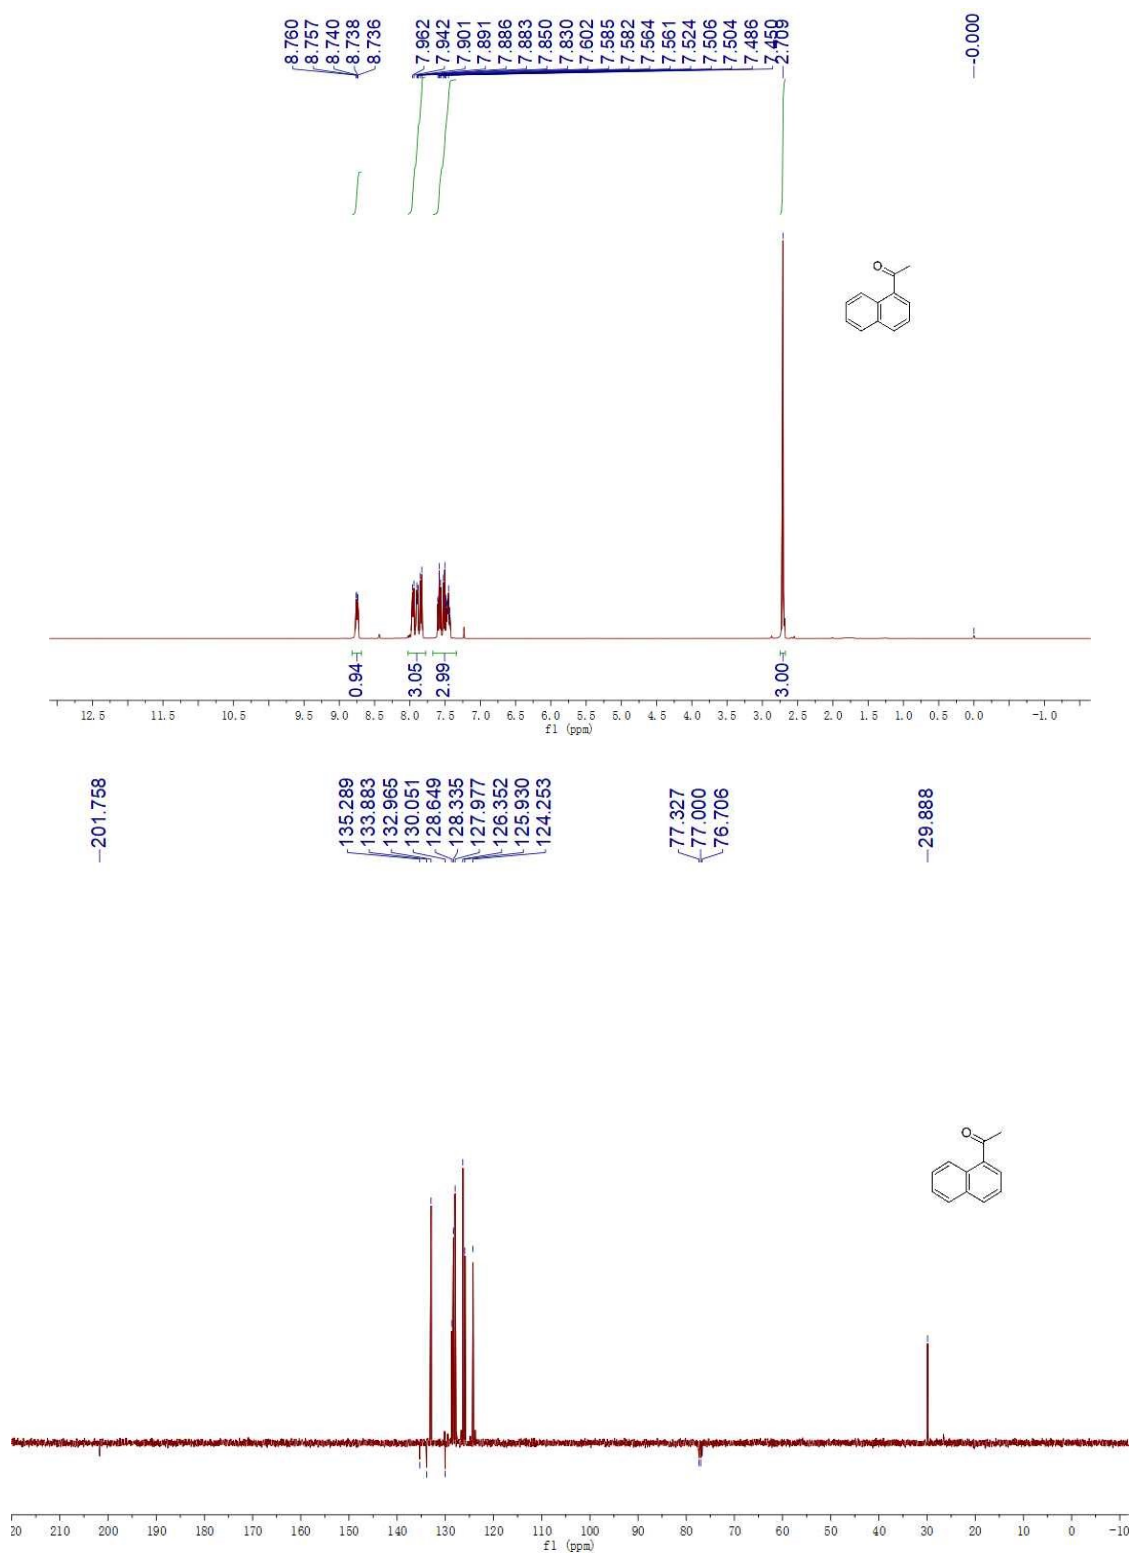

**Figure S14.** <sup>1</sup>H and <sup>13</sup>C NMR spectra of 1-mesitylethan-1-one (**2h**). <sup>1</sup>H NMR (400 MHz, CDCl<sub>3</sub>): δ 8.76-8.74 (m, 1H), 7.96-7.83 (m, 3H), 7.60-7.43 (m, 3H), 2.71 (s, 3H). <sup>13</sup>C NMR (100 MHz, CDCl<sub>3</sub>): δ 201.8, 135.3, 133.9, 133.0, 130.1, 128.6, 128.3, 128.0, 126.4, 125.9, 124.2, 29.9.

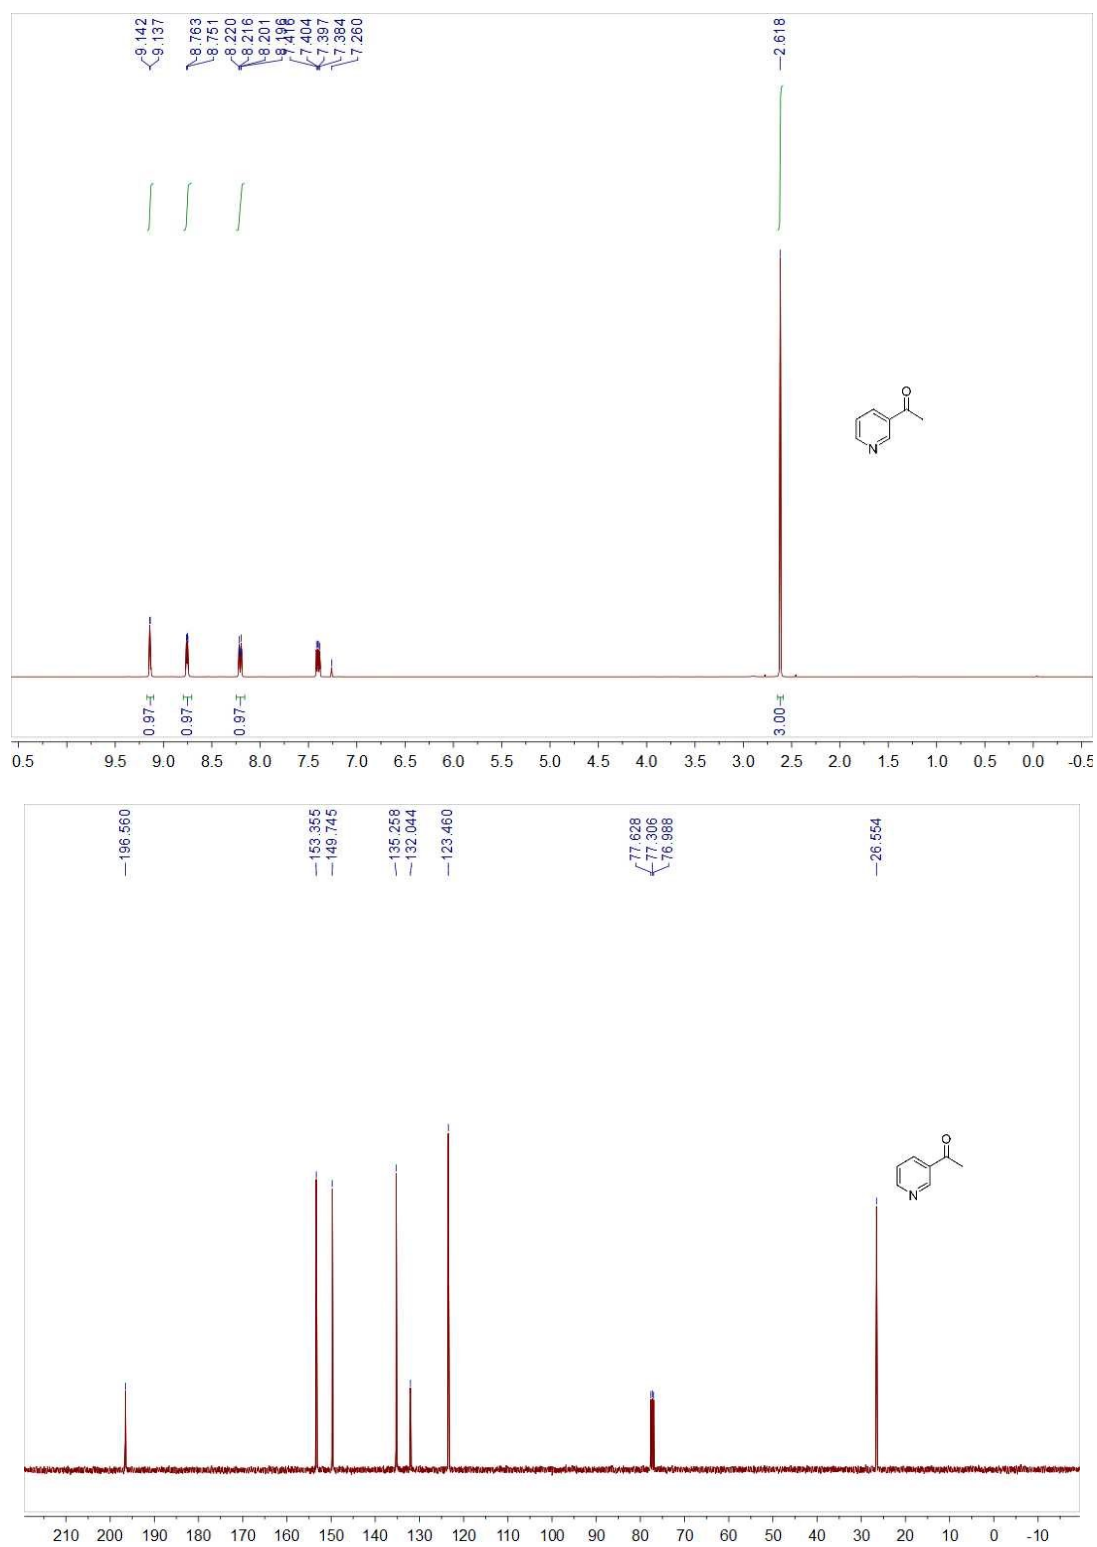

**Figure S15.** <sup>1</sup>H and <sup>13</sup>C NMR spectra of 1-(pyridin-3-yl)ethan-1-one (**2h**). <sup>1</sup>H NMR (400 MHz, CDCl<sub>3</sub>): δ 9.14 (m, *J* = 2.0 Hz, 1H), 8.76, 8.75 (dd, *J* = 1.6, 1.6 Hz, 1H), 8.22, 8.20 (tt, *J* = 1.6, 2.0 Hz, 1H), 7.40 (q, *J* = 2.8 Hz, 1H), 2.62 (m, 3H). <sup>13</sup>C NMR (100 MHz, CDCl<sub>3</sub>): δ 196.56, 153.36, 149.75, 135.26, 132.04, 123.46, 26.55.

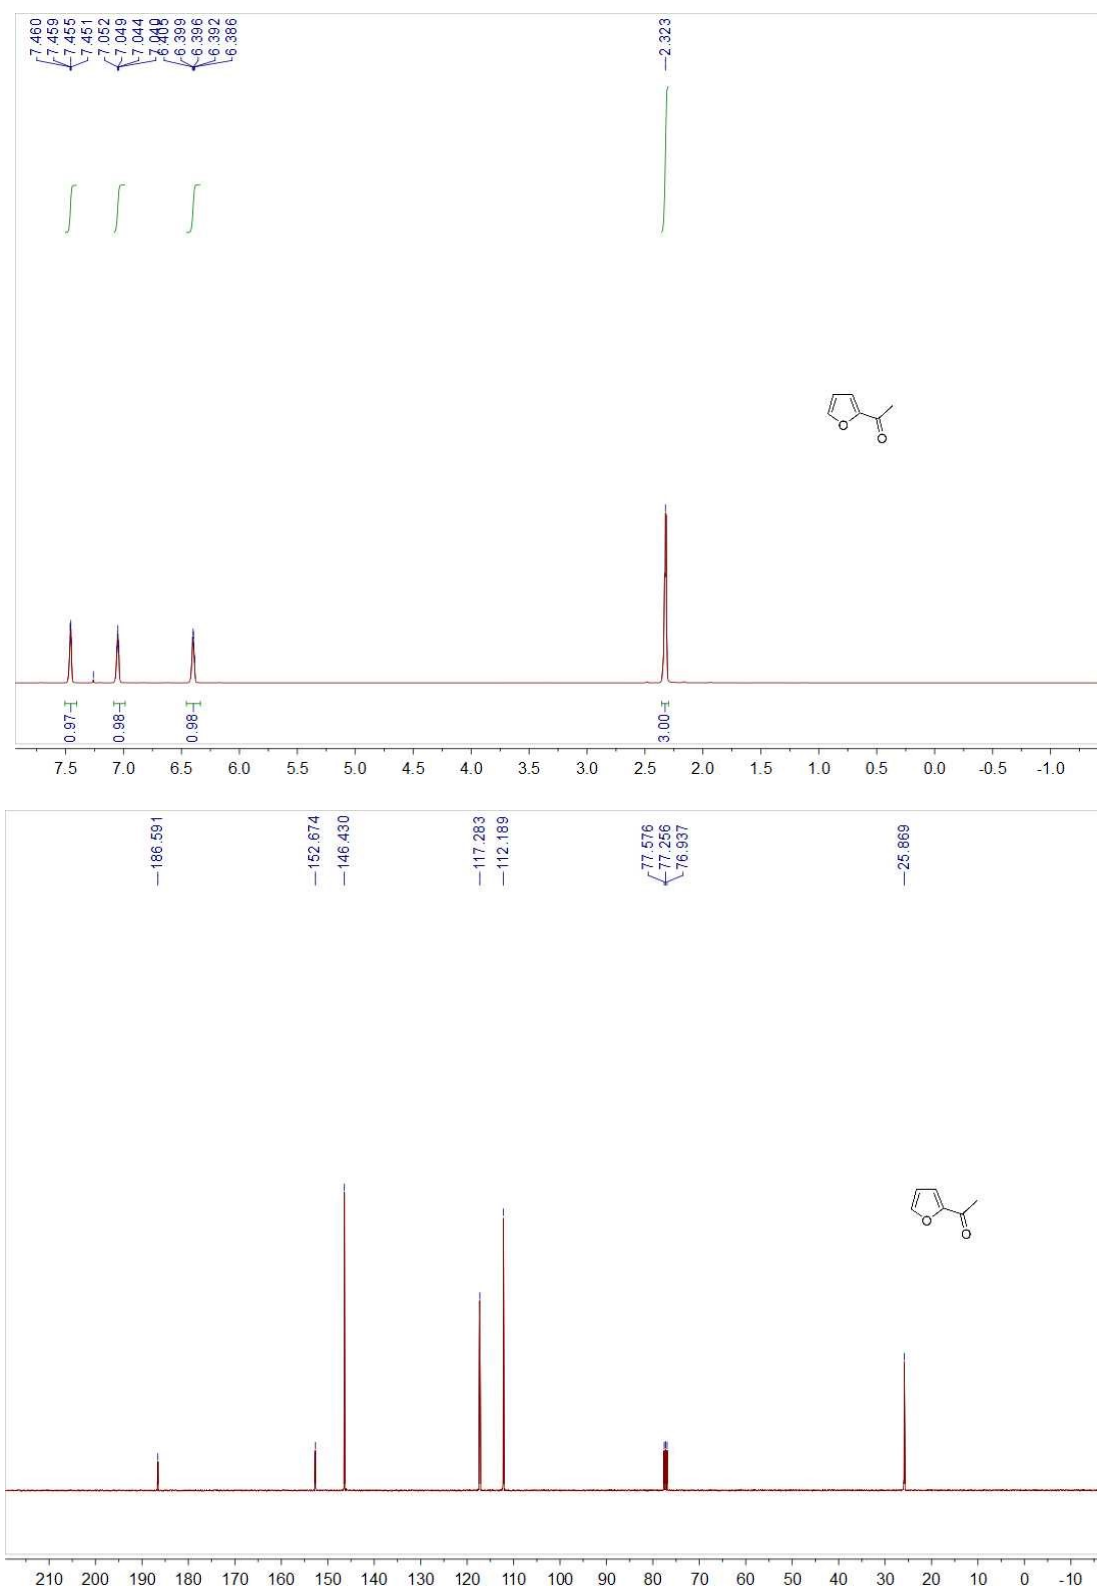

**Figure S16.**  $^1\text{H}$  and  $^{13}\text{C}$  NMR spectra of 1-(furan-2-yl)ethan-1-one (**2j**).  $^1\text{H}$  NMR (400 MHz,  $\text{CDCl}_3$ ):  $\delta$  7.46-7.45 (m, 1H), 7.06-7.04 (m, 1H), 8.41-8.39 (m, 1H), 2.32 (s, 3H).  $^{13}\text{C}$  NMR (100 MHz,  $\text{CDCl}_3$ ):  $\delta$  188.59, 152.67, 146.43, 117.28, 112.19, 25.87.

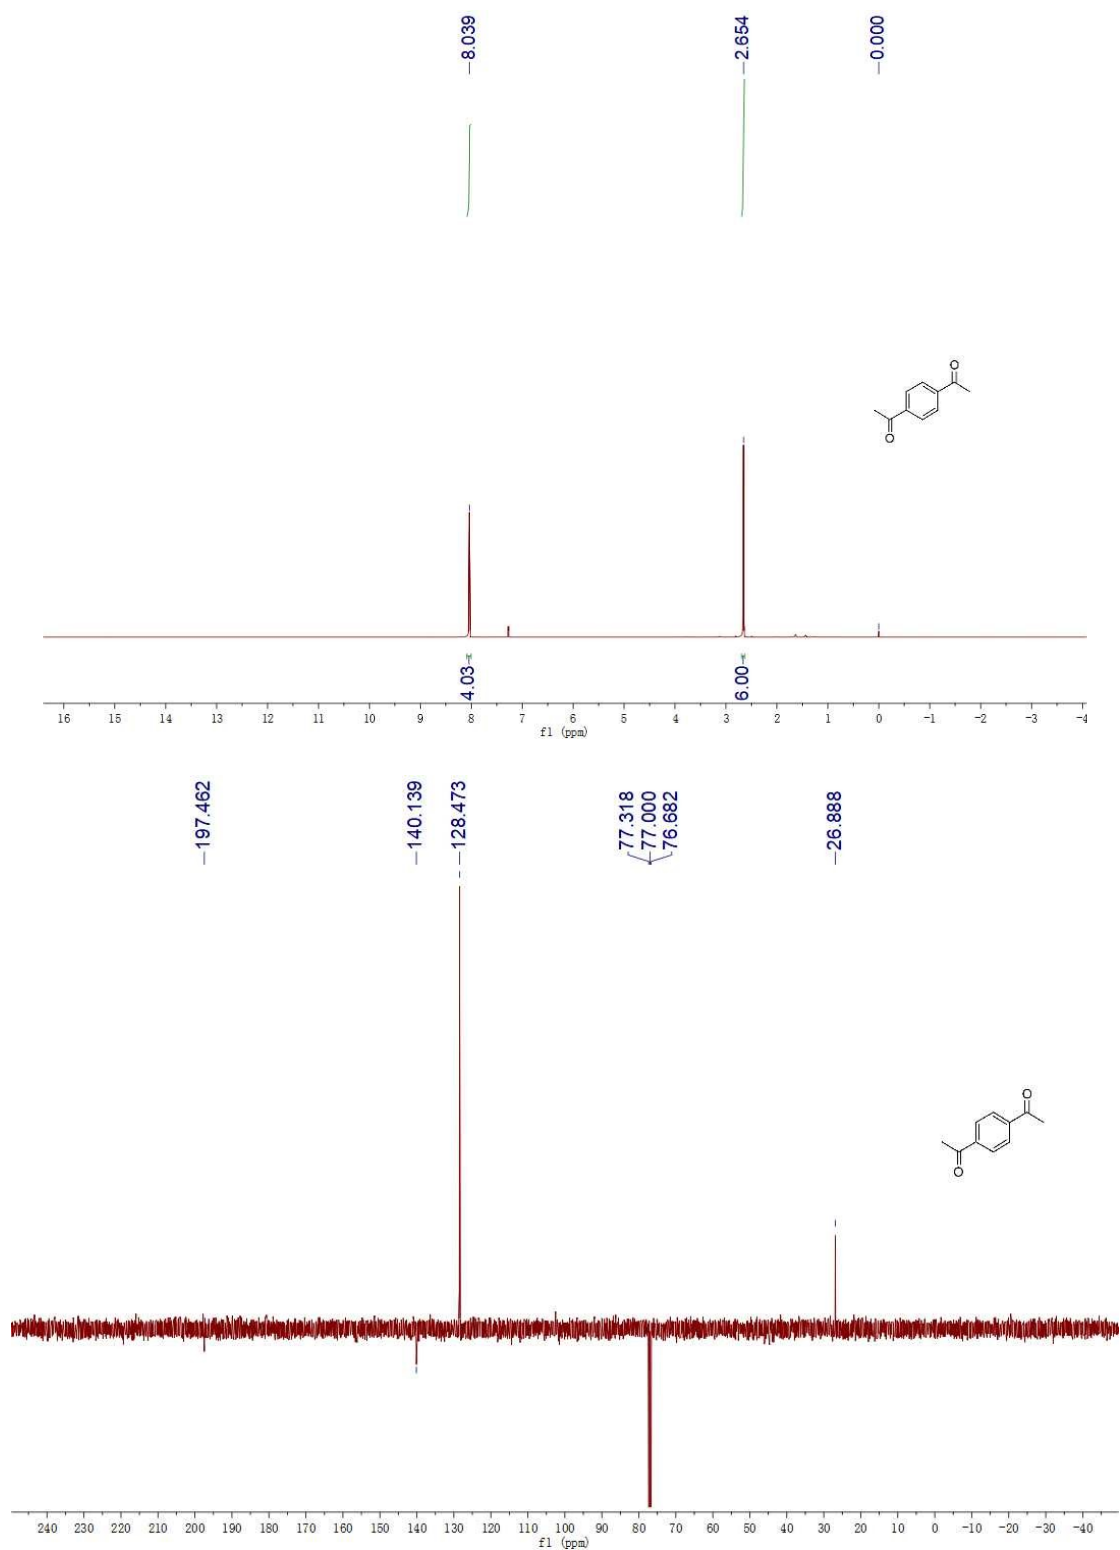

**Figure S17.**  $^1\text{H}$  and  $^{13}\text{C}$  NMR spectra of 1,1'-(1,4-phenylene)bis(ethan-1-one) (**2k**).  $^1\text{H}$  NMR (400 MHz,  $\text{CDCl}_3$ ):  $\delta$  8.04 (s, 4H), 2.65 (s, 6H).  $^{13}\text{C}$  NMR (100 MHz,  $\text{CDCl}_3$ ):  $\delta$  197.5, 140.1, 128.5, 26.9.

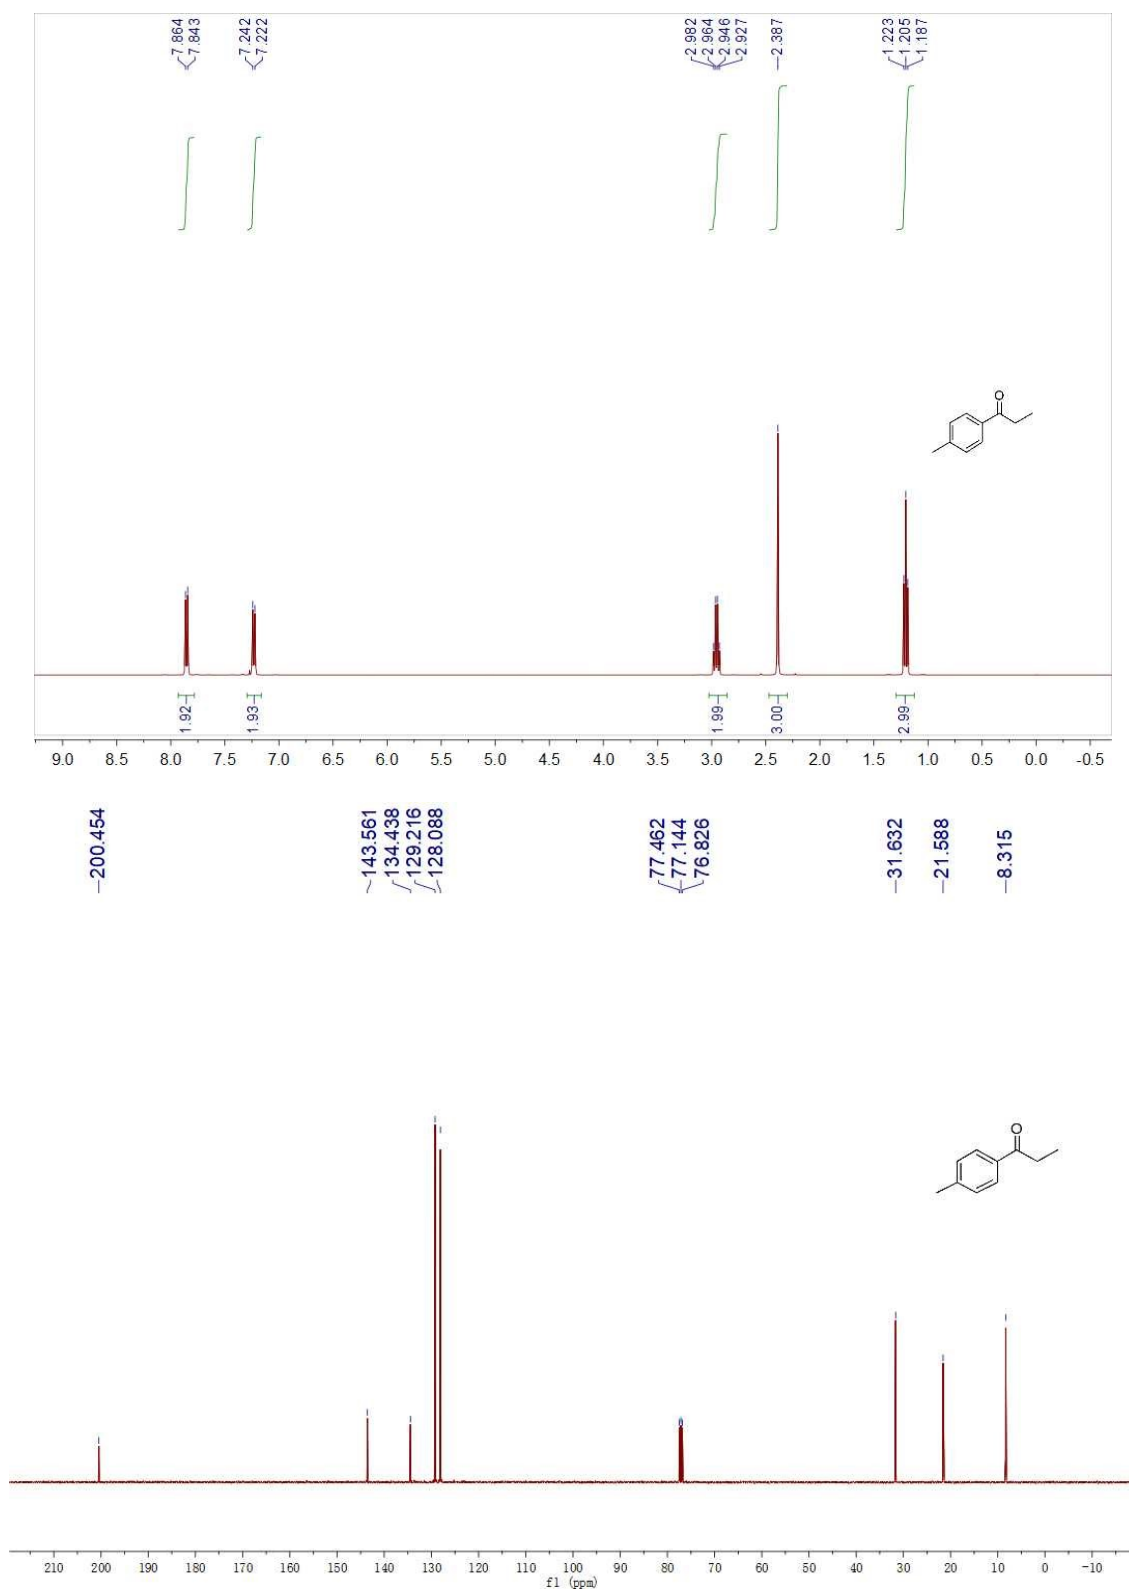

**Figure S18.**  $^1\text{H}$  and  $^{13}\text{C}$  NMR spectra of 1,1'-(1,4-phenylene)bis(ethan-1-one) (**21**).  $^1\text{H}$  NMR (400 MHz,  $\text{CDCl}_3$ ):  $\delta$  7.85 (d,  $J = 8.4$  Hz, 2H), 7.23 (d,  $J = 8.0$  Hz, 2H), 2.96 (q,  $J = 7.2$  Hz, 2H), 2.39 (s, 3H), 1.21 (t,  $J = 7.2$  Hz, 3H).  $^{13}\text{C}$  NMR (100 MHz,  $\text{CDCl}_3$ ):  $\delta$  200.45, 143.56, 134.44, 129.22, 128.09, 31.63, 21.59, 8.32.

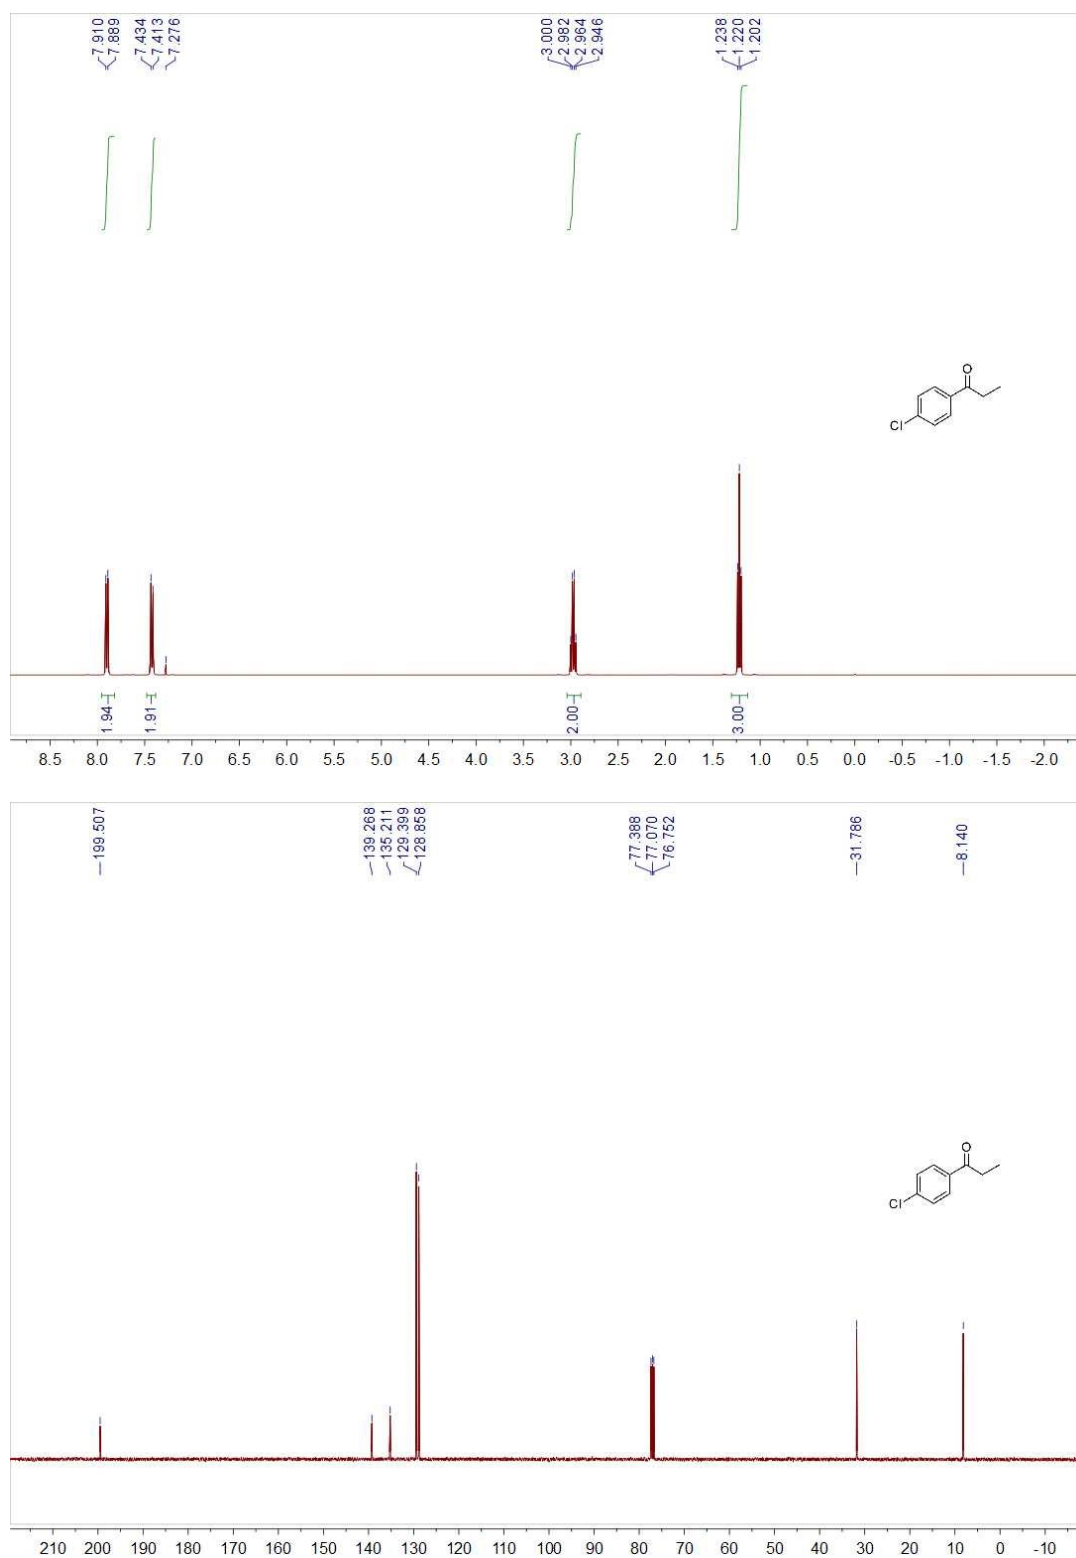

**Figure S19.** <sup>1</sup>H and <sup>13</sup>C NMR spectra of 1-(4-chlorophenyl)propan-1-one (**2m**). <sup>1</sup>H NMR (400 MHz, CDCl<sub>3</sub>): δ 7.89 (d, *J* = 8.4 Hz, 2H), 7.42 (d, *J* = 8.4 Hz, 2H), 2.97 (q, *J* = 7.2 Hz, 2H), 1.22 (t, *J* = 7.2 Hz, 3H). <sup>13</sup>C NMR (100 MHz, CDCl<sub>3</sub>): δ 199.51, 139.27, 135.21, 129.40, 128.86, 31.79, 8.14.

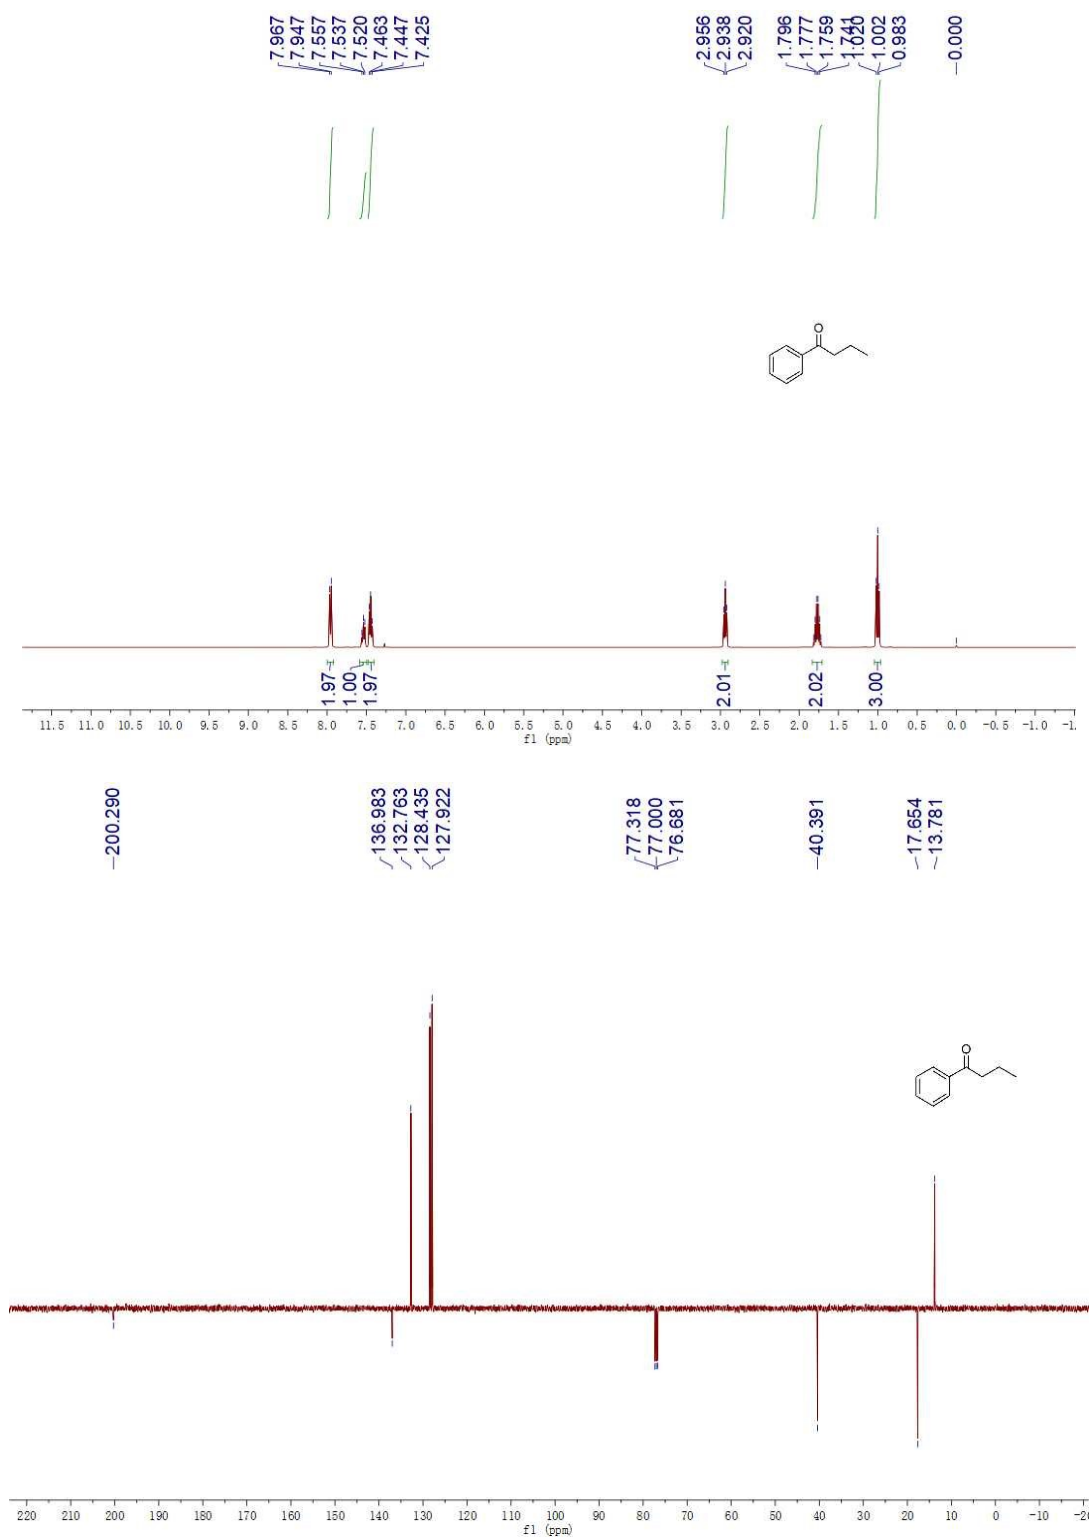

**Figure S20.** <sup>1</sup>H and <sup>13</sup>C NMR spectra of 1-phenylbutan-1-one (**2n**). <sup>1</sup>H NMR (400 MHz, CDCl<sub>3</sub>): δ 7.96 (d, *J* = 8.0 Hz, 2H), 7.54 (t, *J* = 8.0 Hz, 1H), 7.45 (t, *J* = 6.4 Hz, 2H), 2.94 (t, *J* = 7.2 Hz, 2H), 1.81-1.72 (m, 2H), 1.00 (t, *J* = 8.0 Hz, 3H). <sup>13</sup>C NMR (100 MHz, CDCl<sub>3</sub>): δ 200.3, 136.9, 132.8, 128.4, 127.9, 40.4, 17.7, 13.8.



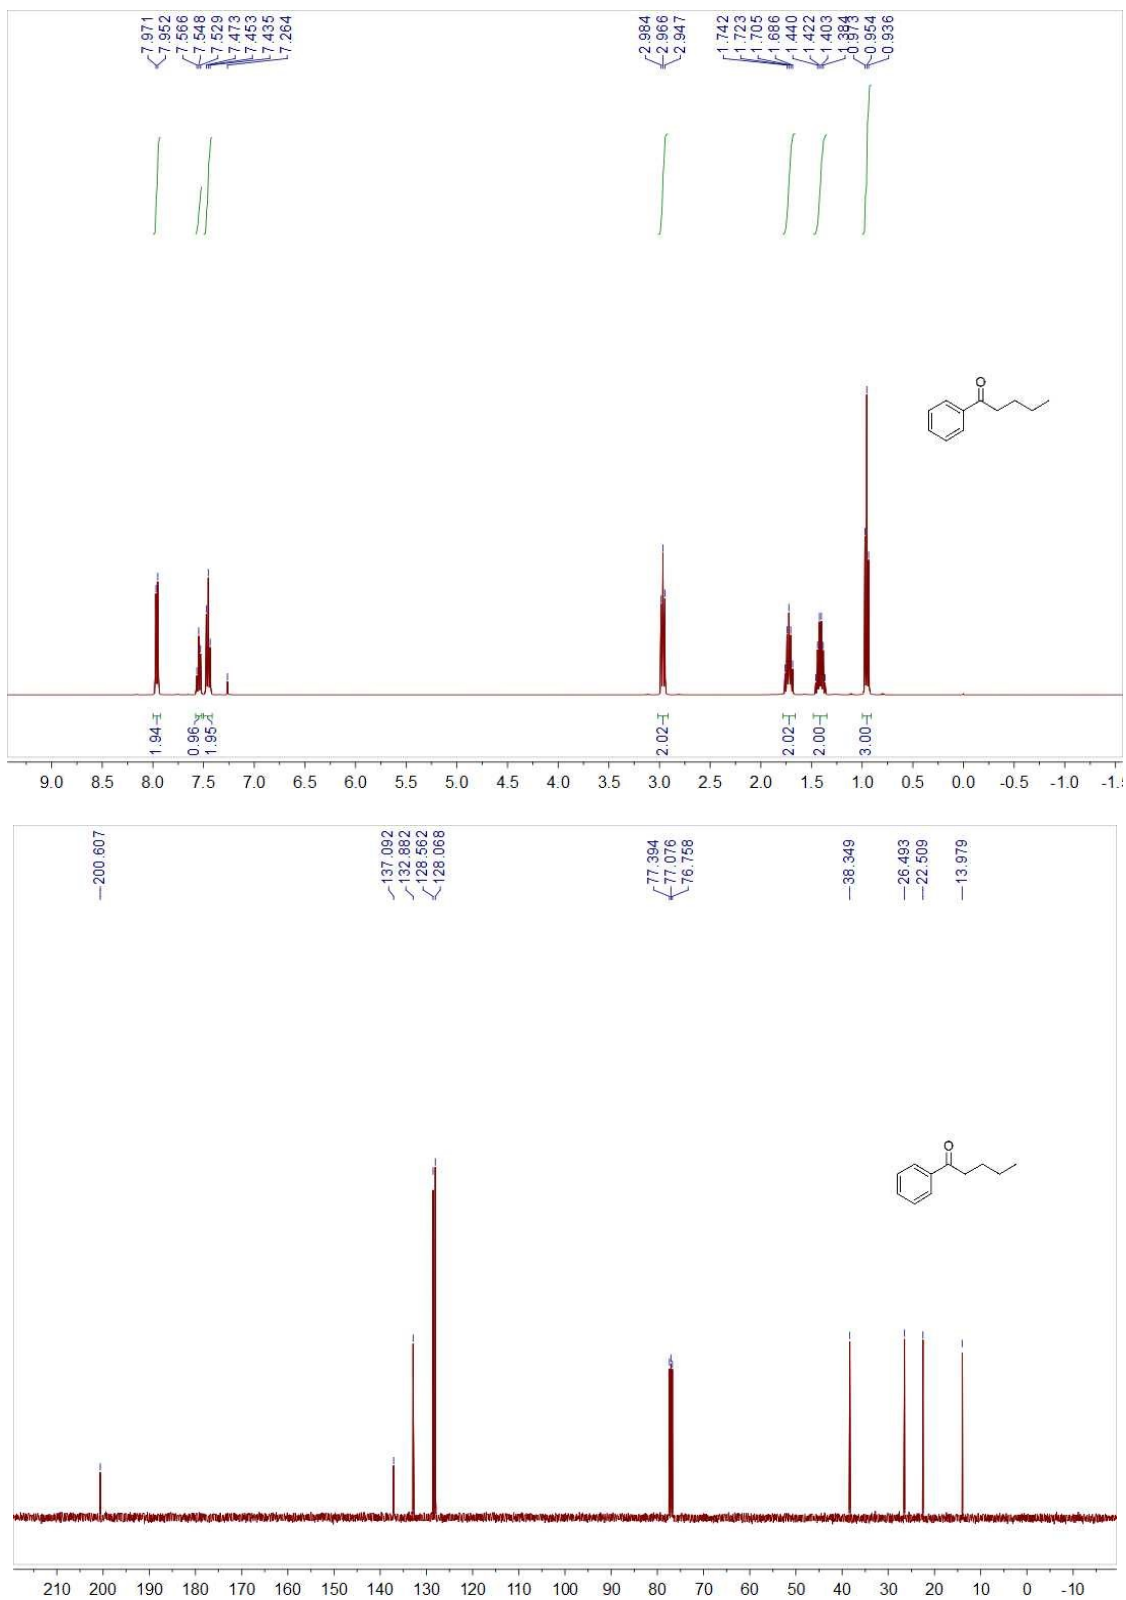

**Figure S21.** <sup>1</sup>H and <sup>13</sup>C NMR spectra of 1-phenylpentan-1-one (**2o**). <sup>1</sup>H NMR (400 MHz, CDCl<sub>3</sub>): δ 7.96 (d, *J* = 7.6 Hz, 2H), 7.55 (t, *J* = 7.2 Hz, 1H), 7.45 (t, *J* = 8.0 Hz, 2H), 2.97 (t, *J* = 7.2 Hz, 2H), 1.72 (quint, *J* = 7.6 Hz, 2H), 1.41 (sext, *J* = 7.6 Hz, 2H), 0.954 (t, *J* = 7.6 Hz, 3H). <sup>13</sup>C NMR (100 MHz, CDCl<sub>3</sub>): δ 200.6, 137.1, 132.9, 128.6, 128.1, 38.3, 26.5, 22.5, 13.9.

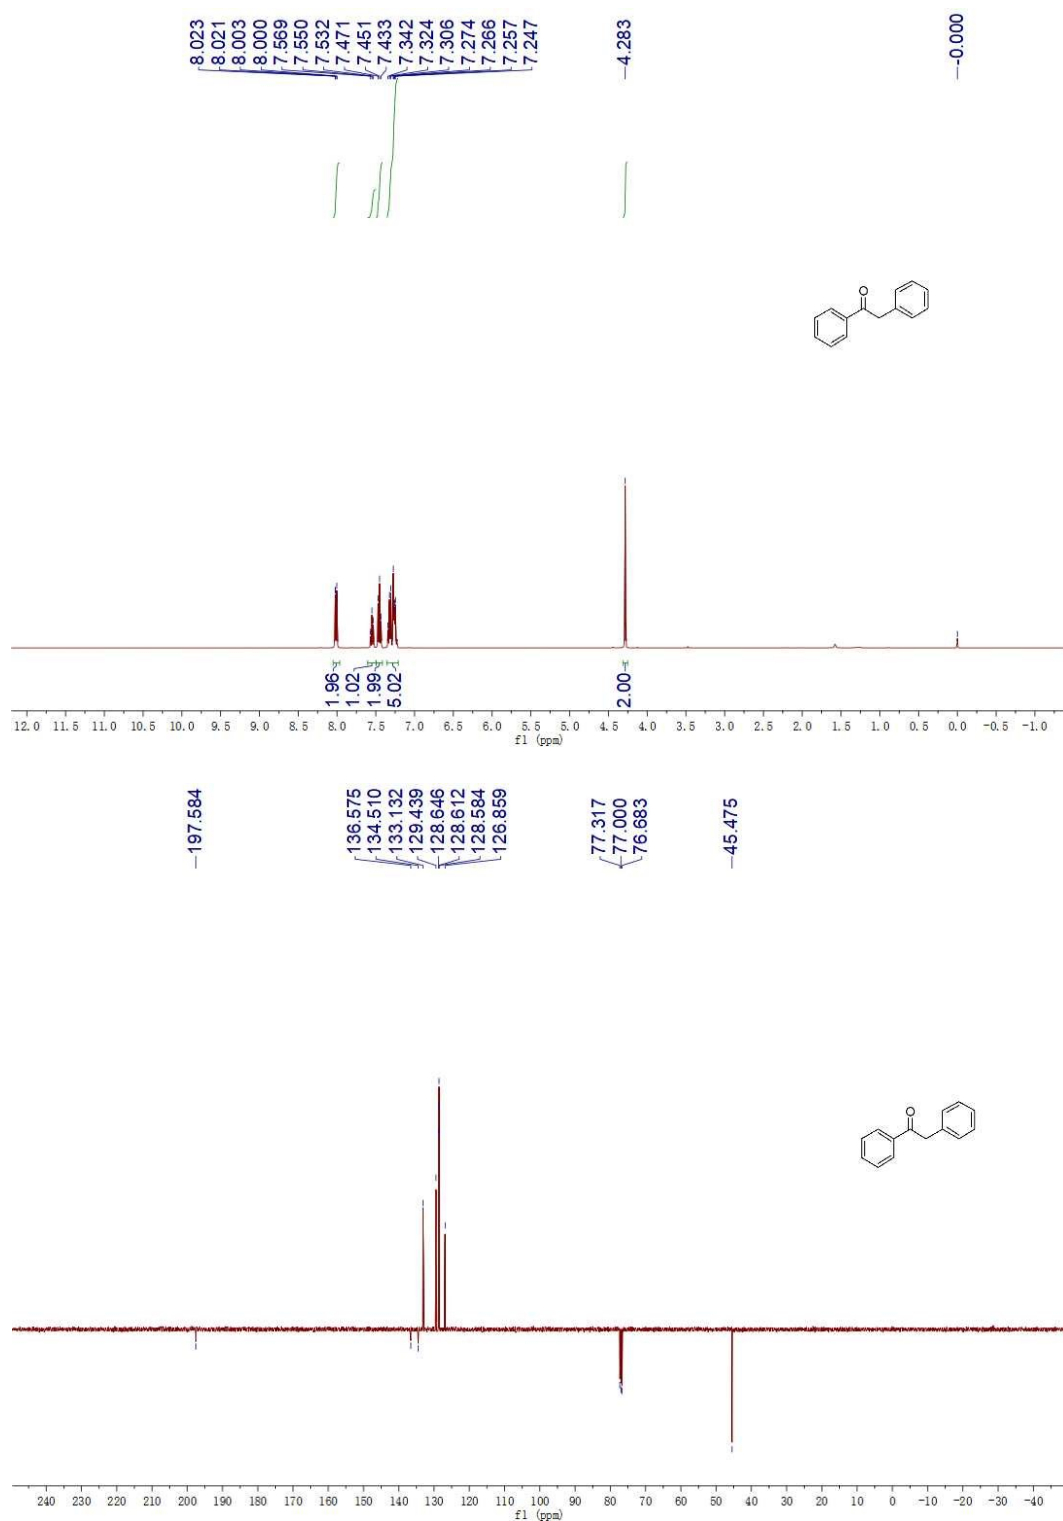

**Figure S22.**  $^1\text{H}$  and  $^{13}\text{C}$  NMR spectra of 1,2-diphenylethan-1-one (**2p**).  $^1\text{H}$  NMR (400 MHz,  $\text{CDCl}_3$ ):  $\delta$  8.02-7.98 (m, 2H), 7.55 (t,  $J = 7.6$  Hz, 1H), 7.45 (t,  $J = 8.0$  Hz, 2H), 7.34-7.25 (m, 5H), 4.28 (s, 2H).  $^{13}\text{C}$  NMR (100 MHz,  $\text{CDCl}_3$ ):  $\delta$  197.6, 136.6, 134.5, 133.1, 129.4, 128.6, 128.6, 128.5, 126.9, 45.5.

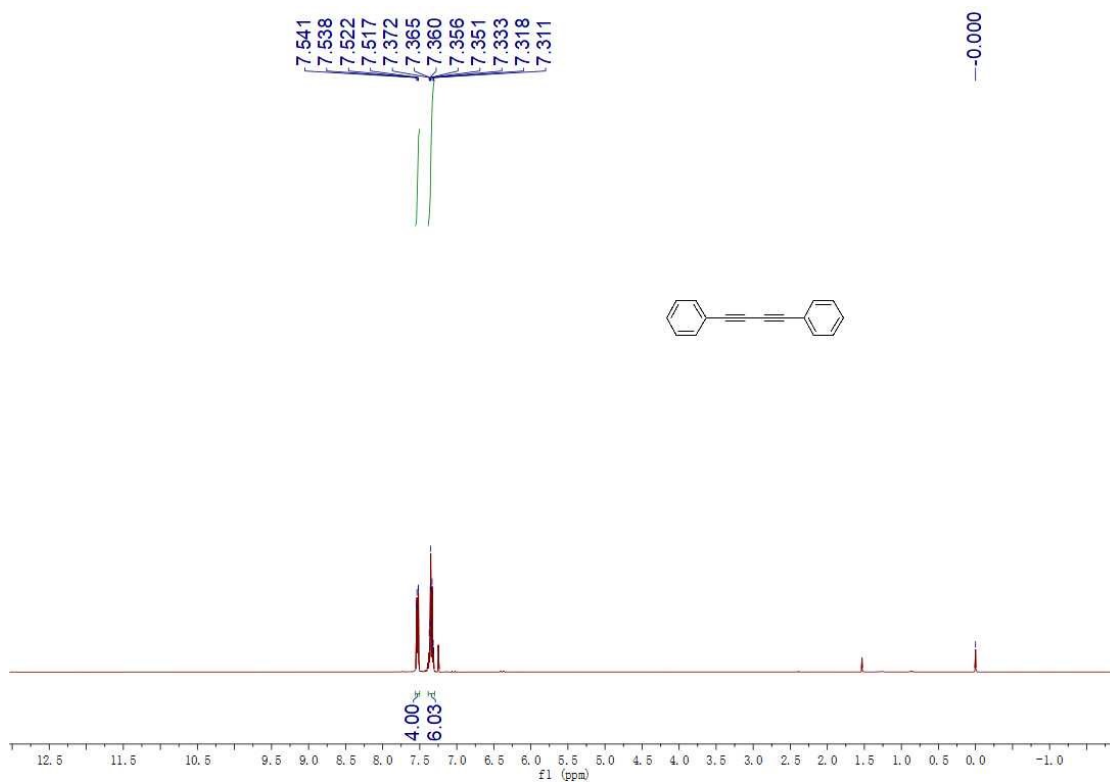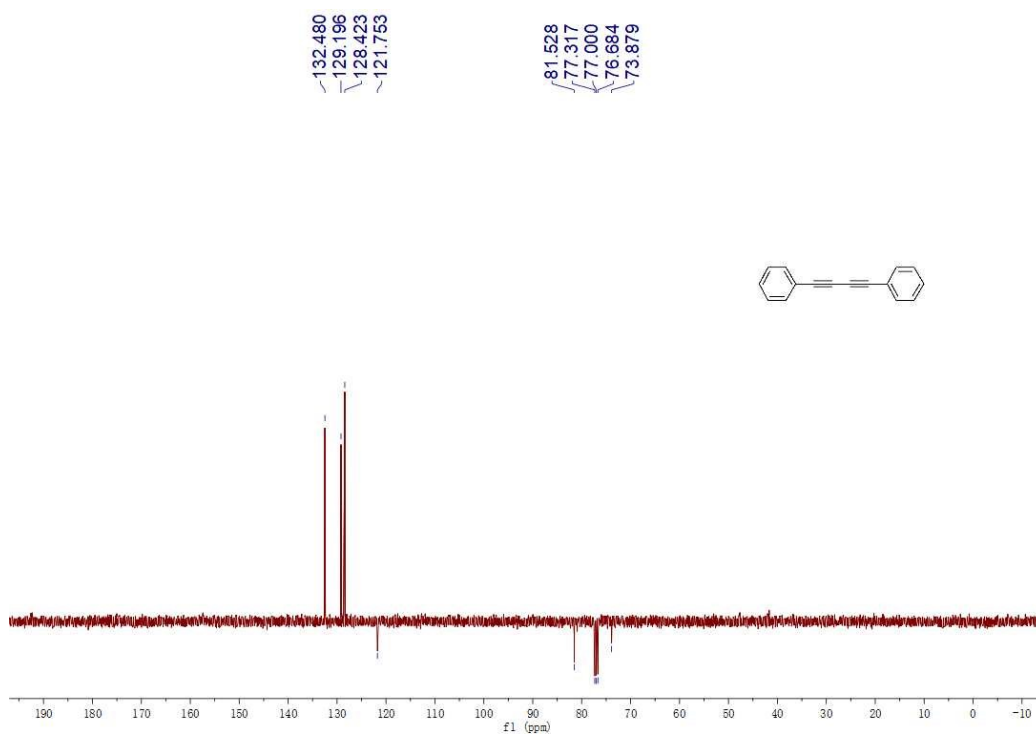

**Figure S23.** <sup>1</sup>H and <sup>13</sup>C NMR spectra of 1,4-diphenylbuta-1,3-diyne (**3a**). <sup>1</sup>H NMR (400 MHz, CDCl<sub>3</sub>): δ 7.54-7.52 (m, 4H), 7.37-7.31 (m, 6H). <sup>13</sup>C NMR (100 MHz, CDCl<sub>3</sub>): δ 132.5, 129.2, 128.4, 121.8, 81.5, 73.9.

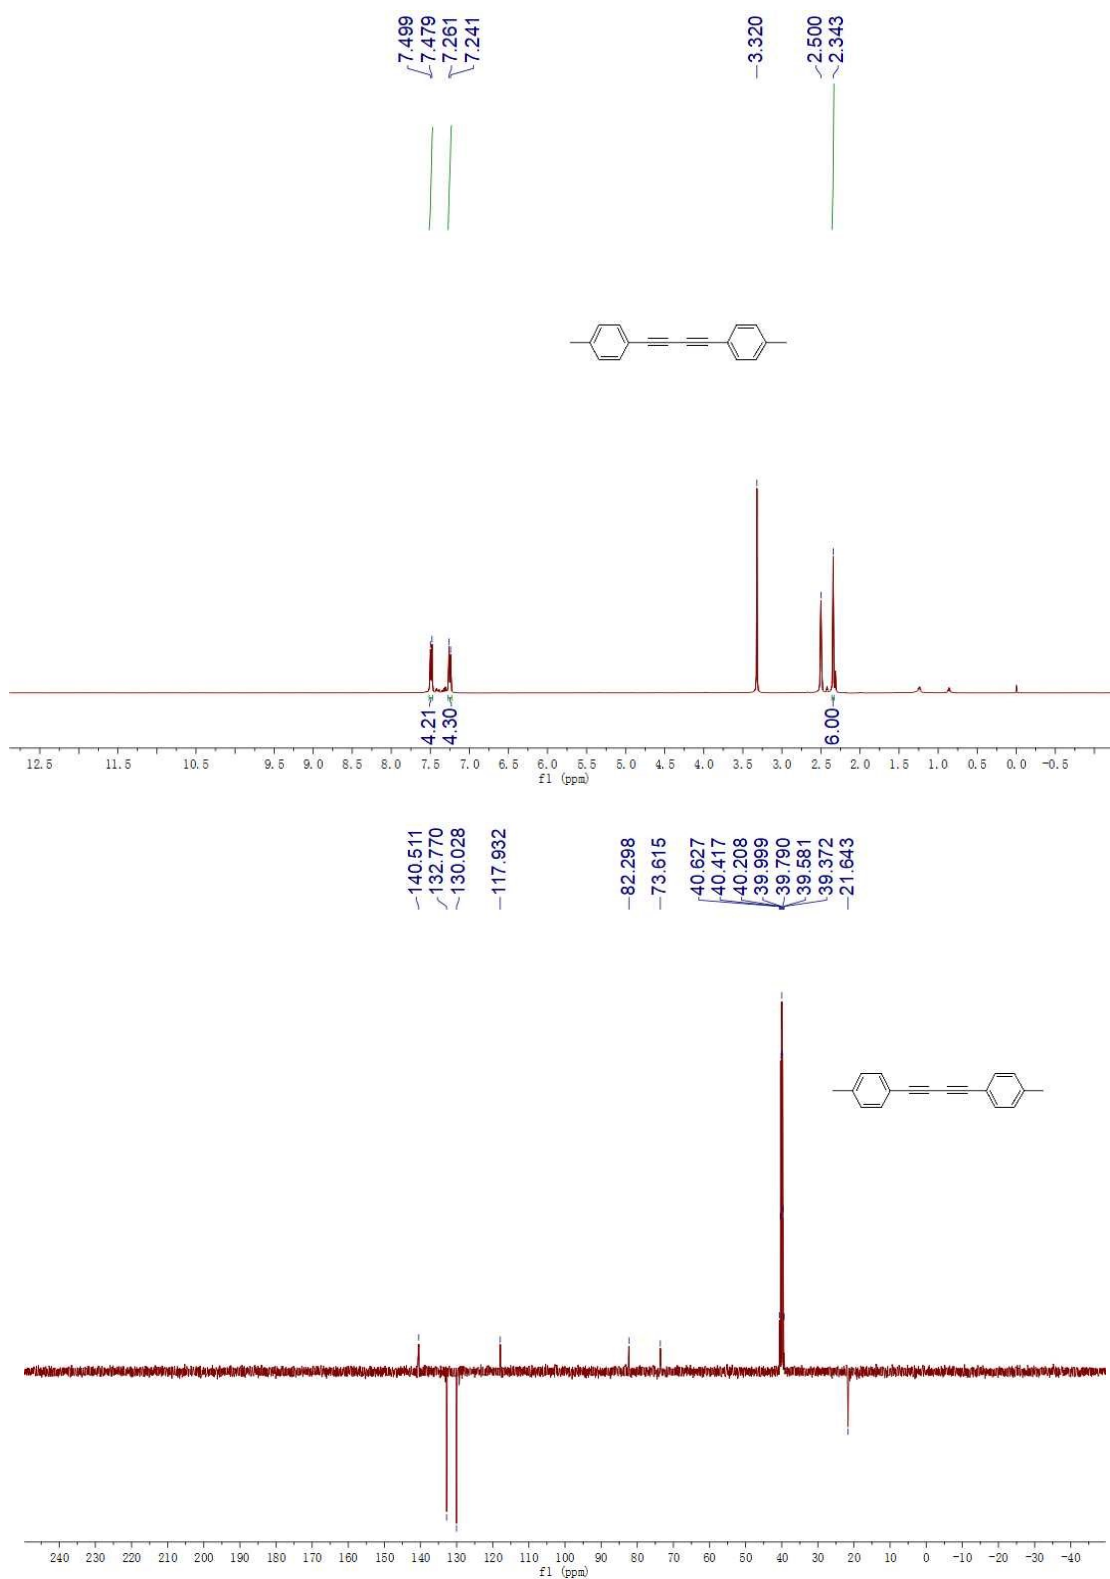

**Figure S24.** <sup>1</sup>H and <sup>13</sup>C NMR spectra of 1,4-di-p-tolylbuta-1,3-diyne (**3b**). <sup>1</sup>H NMR (400 MHz, DMSO-*d*<sub>6</sub>): δ 7.49 (d, *J* = 8.0 Hz, 4H), 7.25 (d, *J* = 8.0 Hz, 4H), 2.34 (s, 6H). <sup>13</sup>C NMR (100 MHz, DMSO-*d*<sub>6</sub>): δ 140.5, 132.8, 130.1, 117.9, 82.3, 73.6, 21.6.

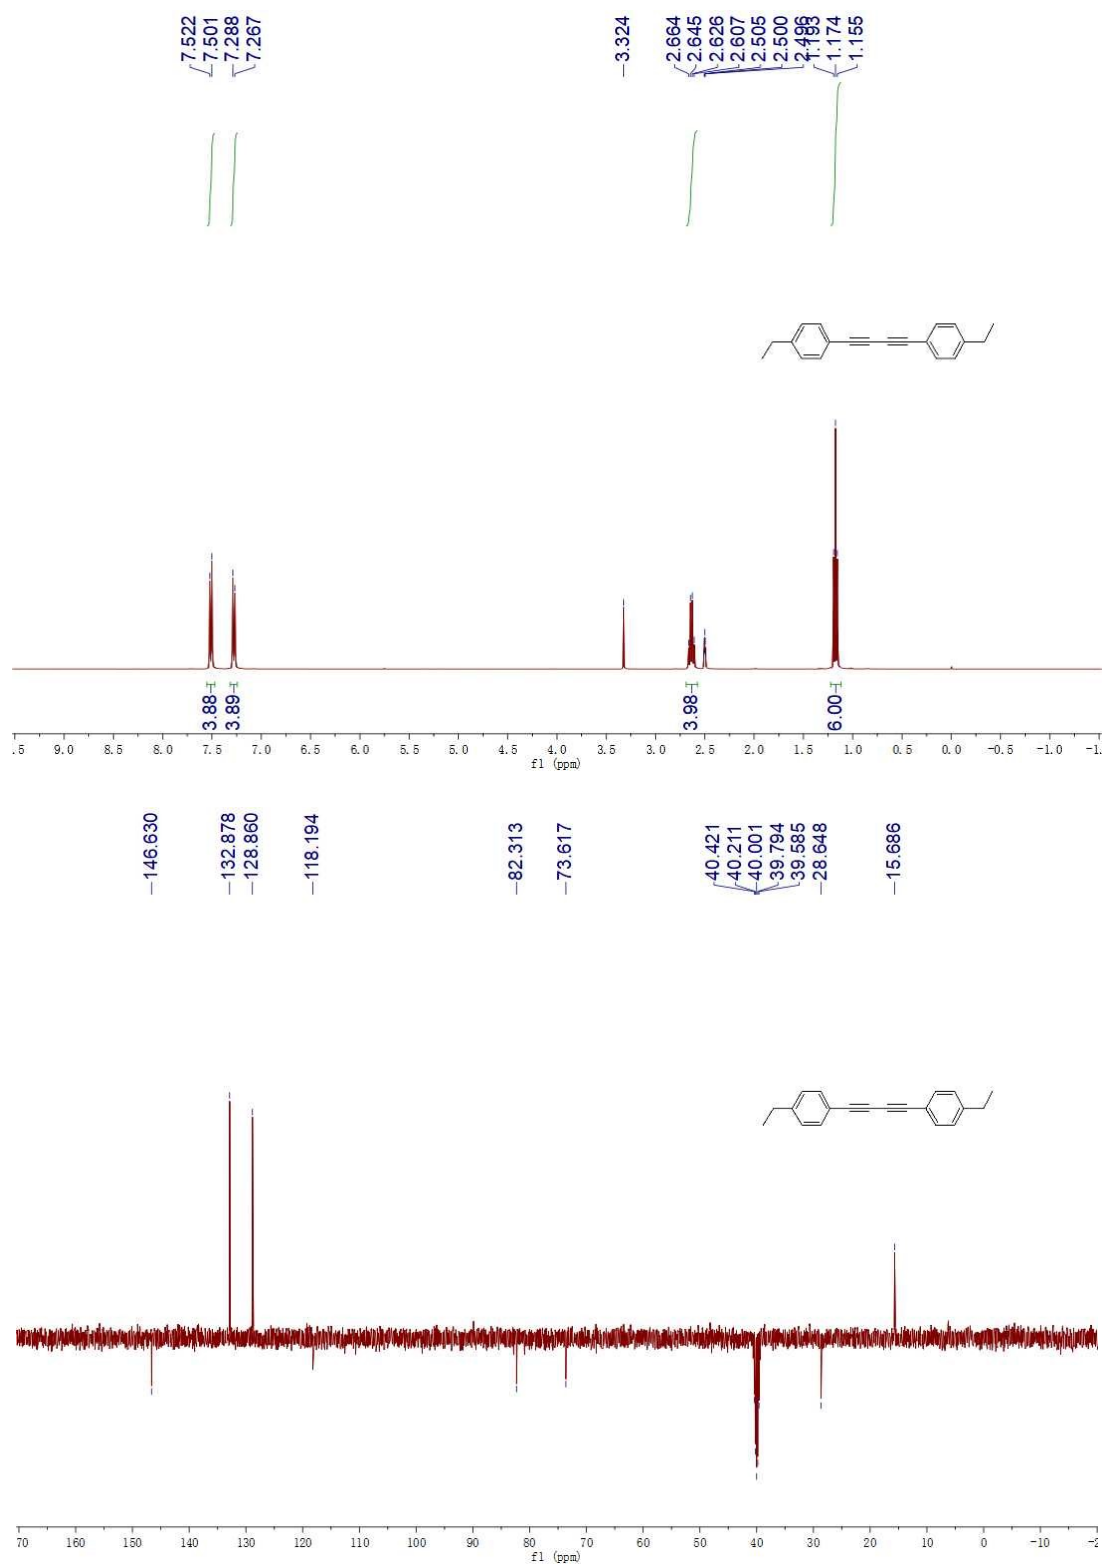

**Figure S25.** <sup>1</sup>H and <sup>13</sup>C NMR spectra of 1,4-bis(4-ethylphenyl)buta-1,3-diyne (**3c**). <sup>1</sup>H NMR (400 MHz, DMSO-*d*<sub>6</sub>): δ 7.51 (d, *J* = 8.4 Hz, 4H), 7.28 (d, *J* = 8.4 Hz, 4H), 2.64 (q, *J* = 7.6 Hz, 4H), 1.17 (t, *J* = 7.6 Hz, 6H). <sup>13</sup>C NMR (100 MHz, DMSO-*d*<sub>6</sub>): δ 146.6, 132.9, 128.9, 118.2, 82.3, 73.6, 28.6, 15.7.

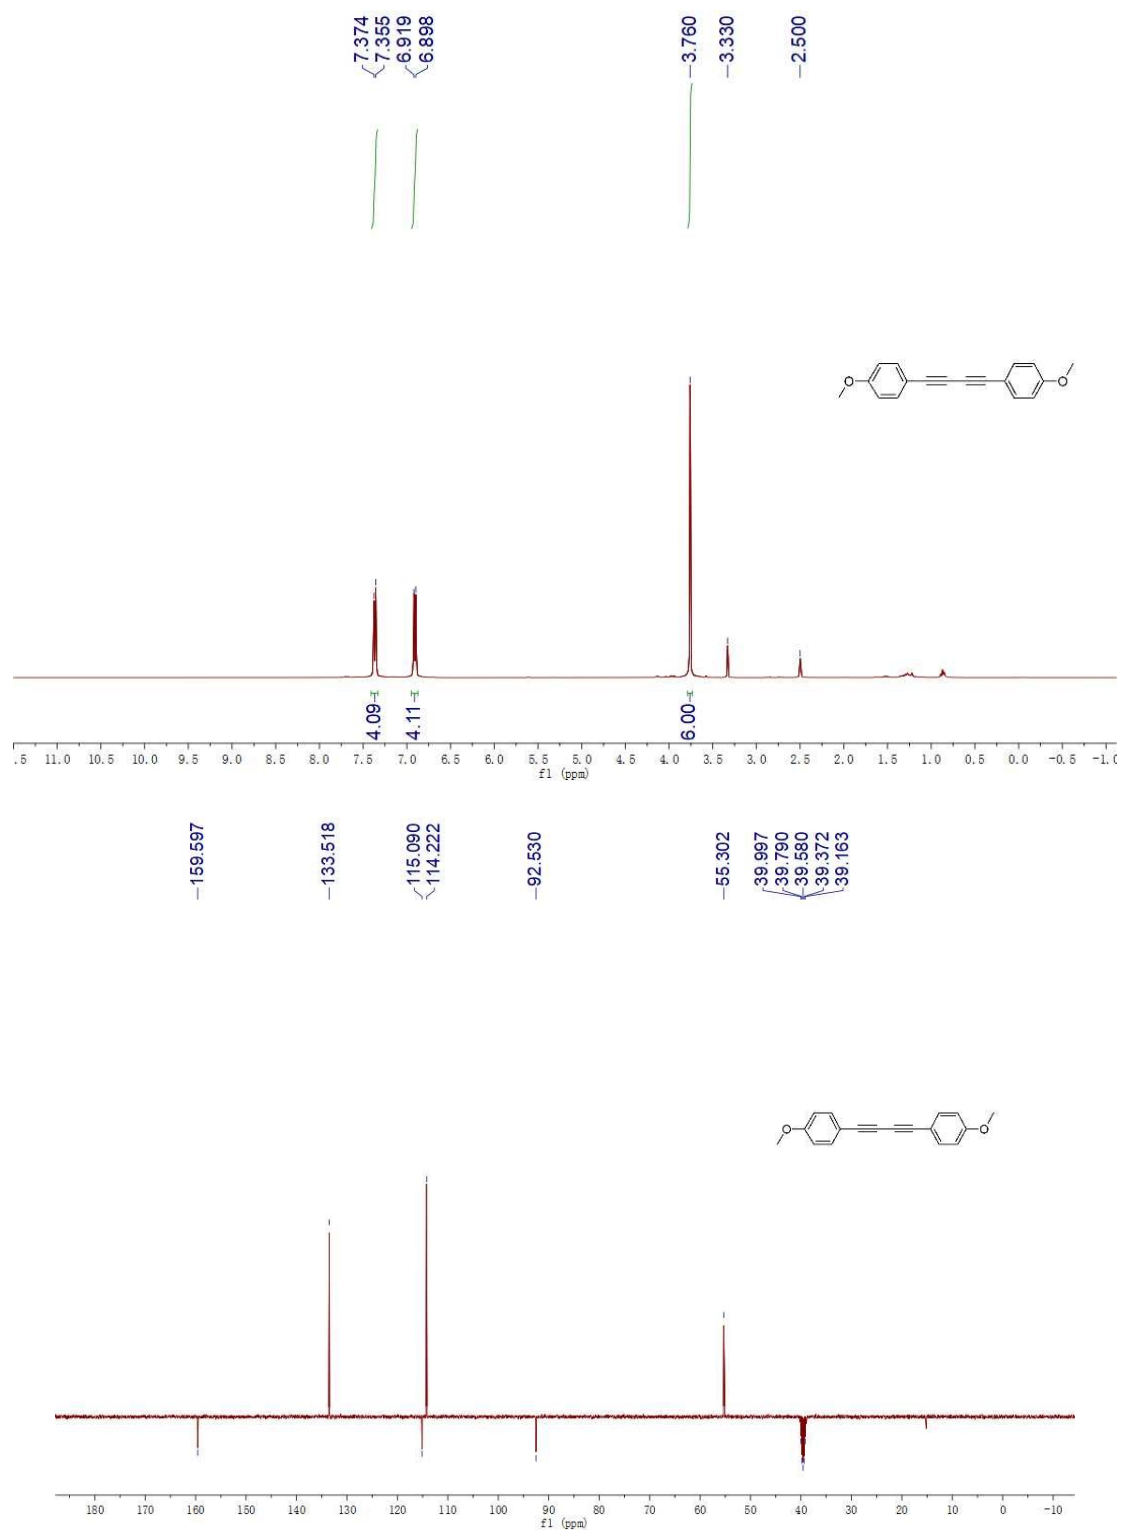

**Figure S26.** <sup>1</sup>H and <sup>13</sup>C NMR spectra of 1,4-bis(4-methoxyphenyl)buta-1,3-diyne (**3d**). <sup>1</sup>H NMR (400 MHz, DMSO-*d*<sub>6</sub>): δ 7.36 (d, *J* = 7.6 Hz, 4H), 6.91 (d, *J* = 8.4 Hz, 4H), 3.76 (s, 6H). <sup>13</sup>C NMR (100 MHz, DMSO-*d*<sub>6</sub>): δ 159.6, 133.5, 115.1, 114.2, 92.5, 55.3.

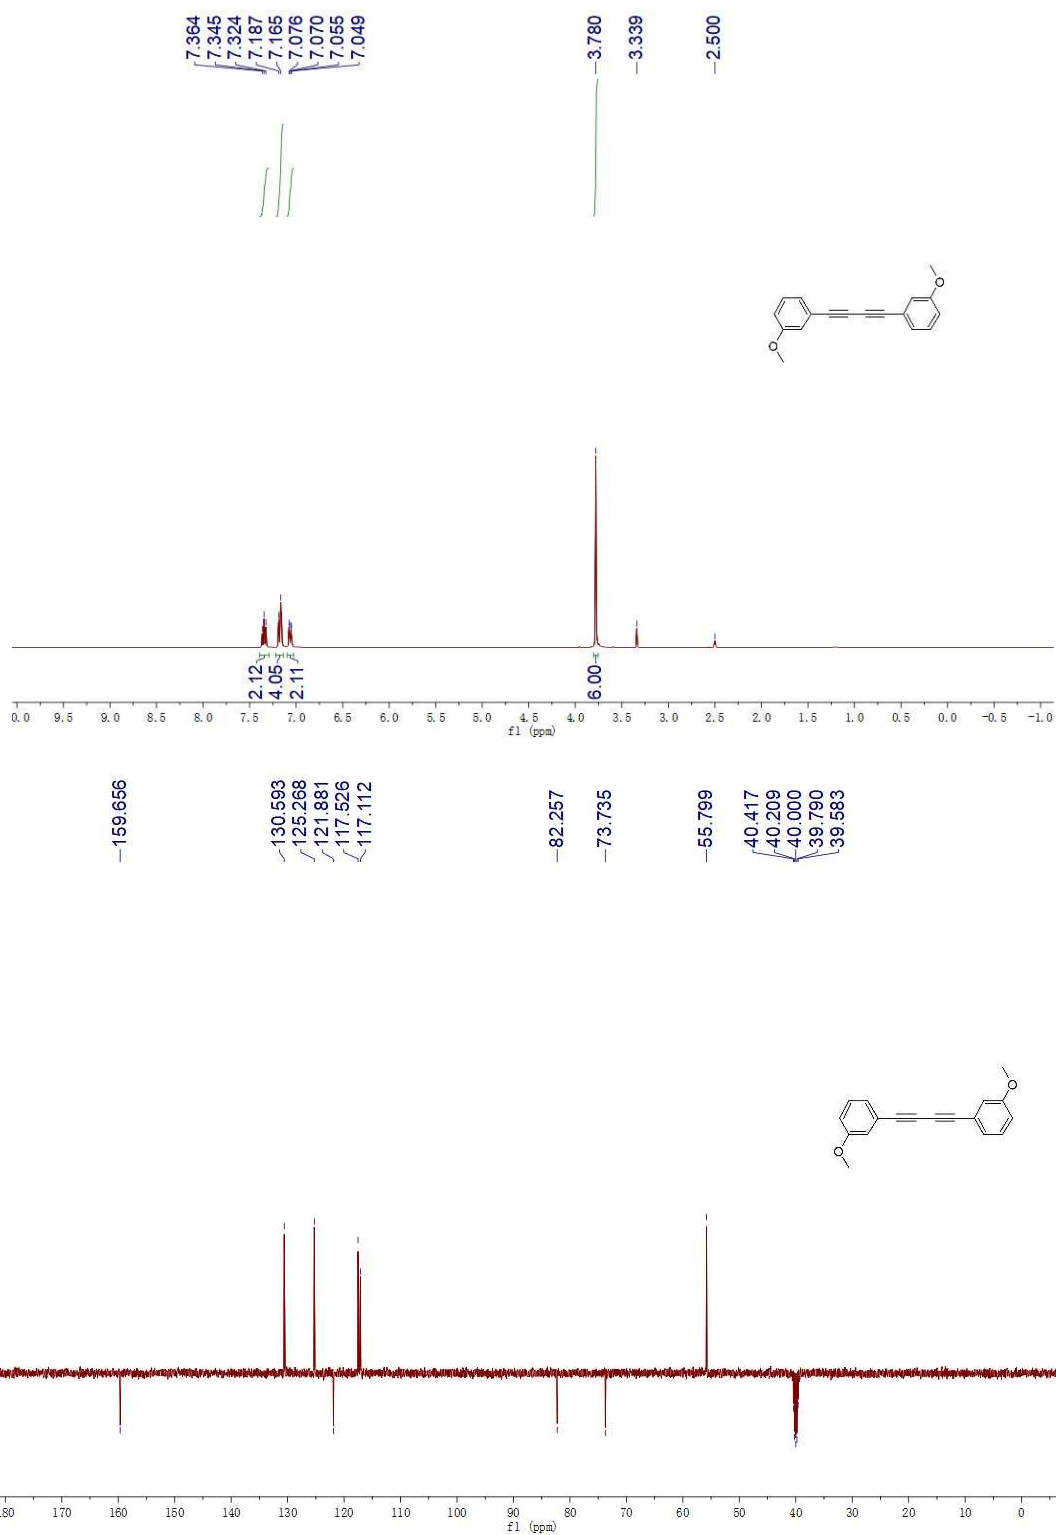

**Figure S27.** <sup>1</sup>H and <sup>13</sup>C NMR spectra of 1,4-bis(3-methoxyphenyl)buta-1,3-diyne (**3e**). <sup>1</sup>H NMR (400 MHz, DMSO-*d*<sub>6</sub>): δ 7.35 (t, *J* = 7.6 Hz, 2H), 7.18 (d, *J* = 8.8 Hz, 4H), 7.08-7.05 (m, 2H), 3.78 (s, 6H). <sup>13</sup>C NMR (100 MHz, DMSO-*d*<sub>6</sub>): δ 159.7, 130.6, 125.3, 121.9, 117.5, 117.1, 82.3, 73.7, 55.8.

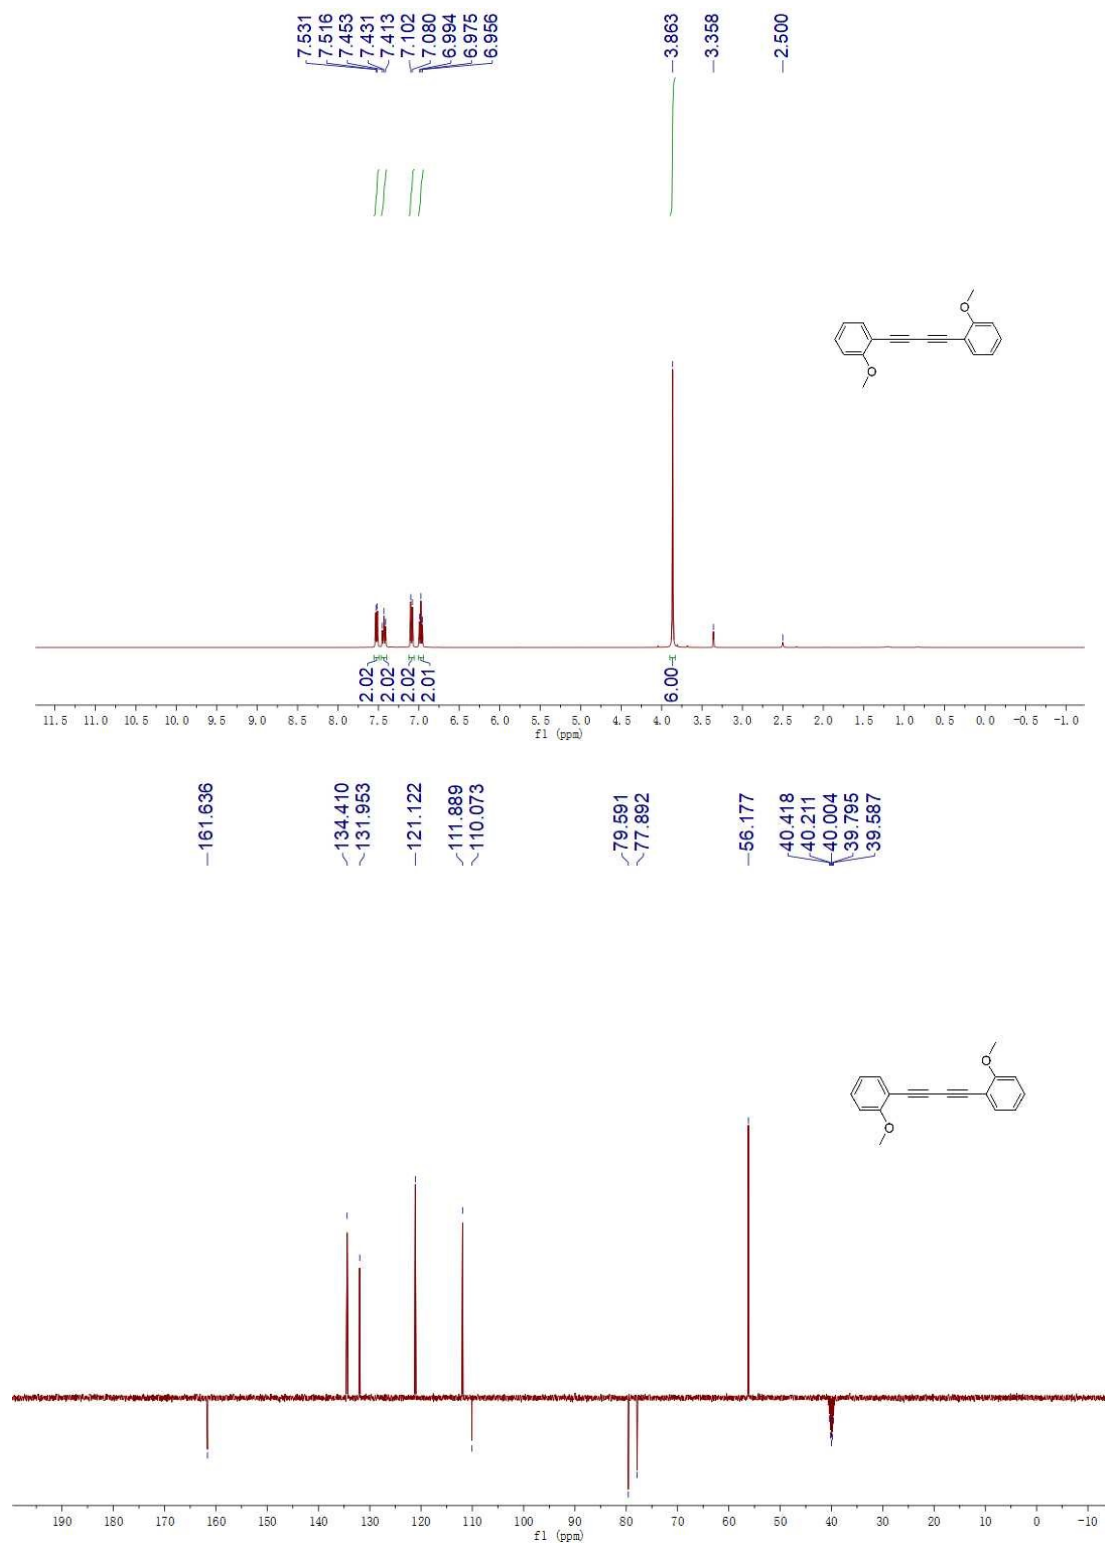

**Figure S28.** <sup>1</sup>H and <sup>13</sup>C NMR spectra of 1,4-bis(2-methoxyphenyl)buta-1,3-diyne (**3f**). <sup>1</sup>H NMR (400 MHz, DMSO-*d*<sub>6</sub>): δ 7.52 (d, *J* = 6.0 Hz, 2H), 7.43 (d, *J* = 8.8 Hz, 2H), 7.09 (d, *J* = 8.8 Hz, 2H), 6.98 (d, *J* = 7.6 Hz, 2H), 3.86 (s, 6H). <sup>13</sup>C NMR (100 MHz, DMSO-*d*<sub>6</sub>): δ 161.6, 134.4, 132.0, 121.1, 112.0, 110.1, 79.6, 78.0, 56.2.



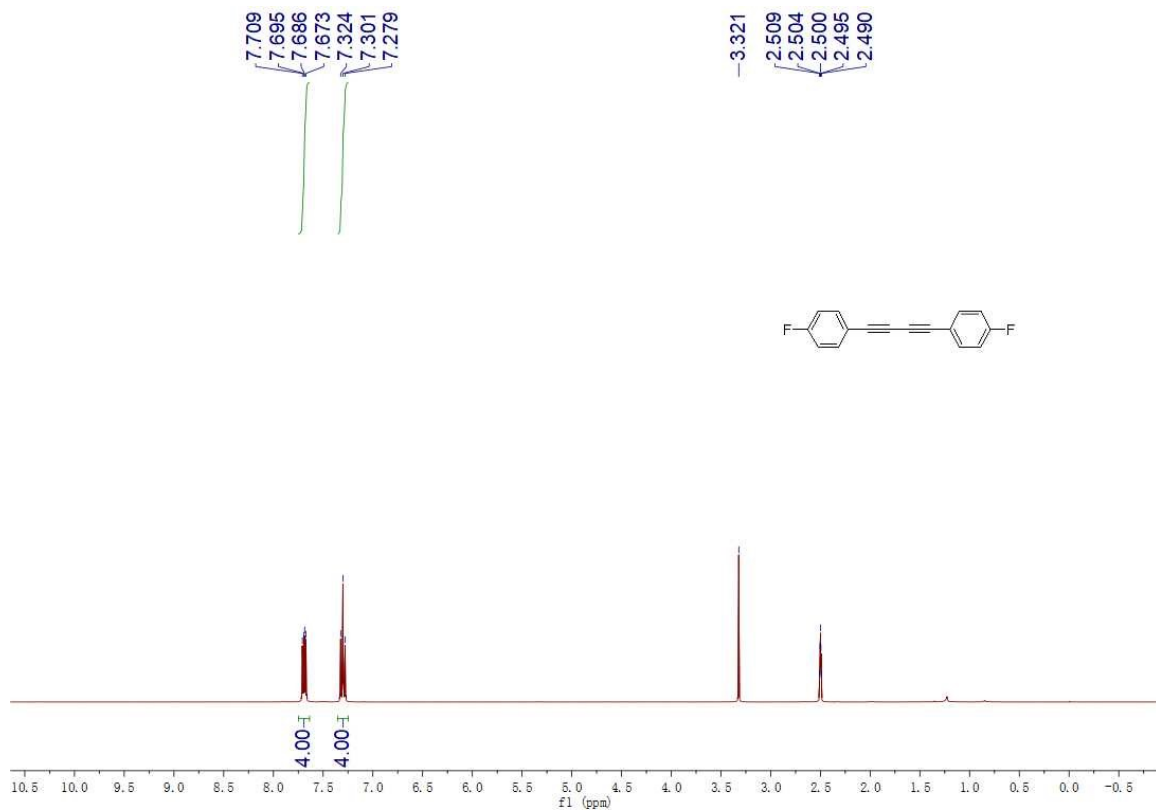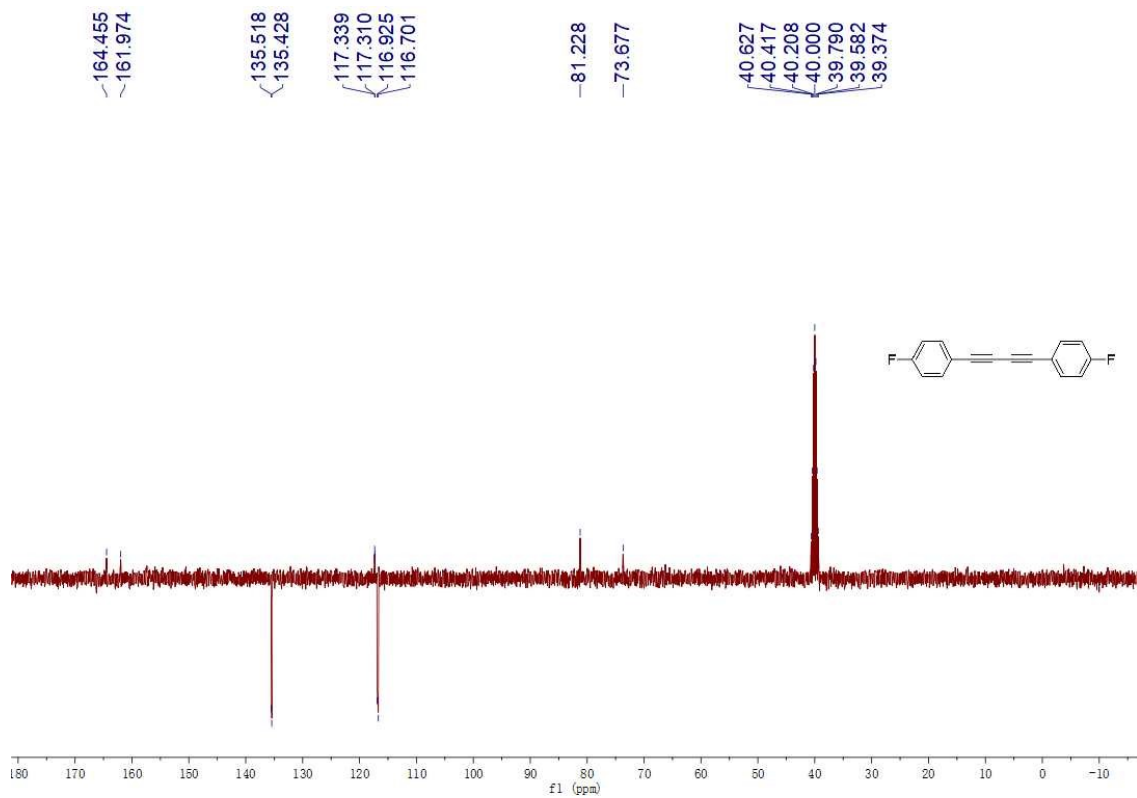

-107.895

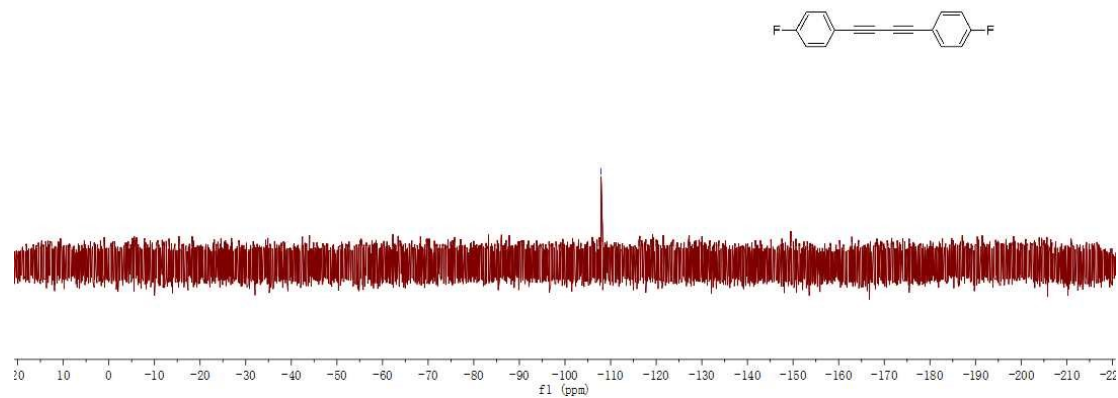

**Figure S29.**  $^1\text{H}$ ,  $^{13}\text{C}$  and  $^{19}\text{F}$  NMR spectra of 1,4-bis(4-fluorophenyl)buta-1,3-diyne (**3g**).  $^1\text{H}$  NMR (400 MHz,  $\text{DMSO-}d_6$ ):  $\delta$  7.69 (q,  $J = 3.6$  Hz, 4H), 7.30 (d,  $J = 9.2$  Hz, 4H).  $^{13}\text{C}$  NMR (100 MHz,  $\text{DMSO-}d_6$ ):  $\delta$  164.5, 162.0 135.5 (d,  $J = 9.0$  Hz), 117.3 (d,  $J = 2.9$  Hz), 116.8 (d,  $J = 22.4$  Hz), 81.2, 73.7.  $^{19}\text{F}$  NMR (376 MHz,  $\text{DMSO-}d_6$ ):  $\delta$  -107.90

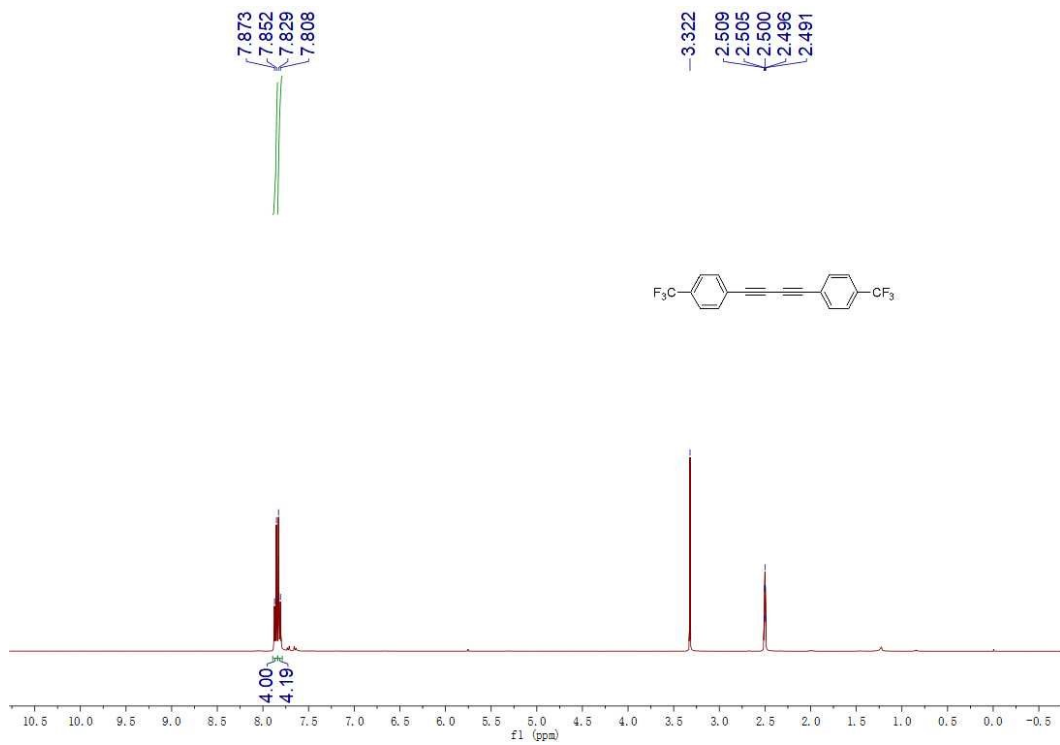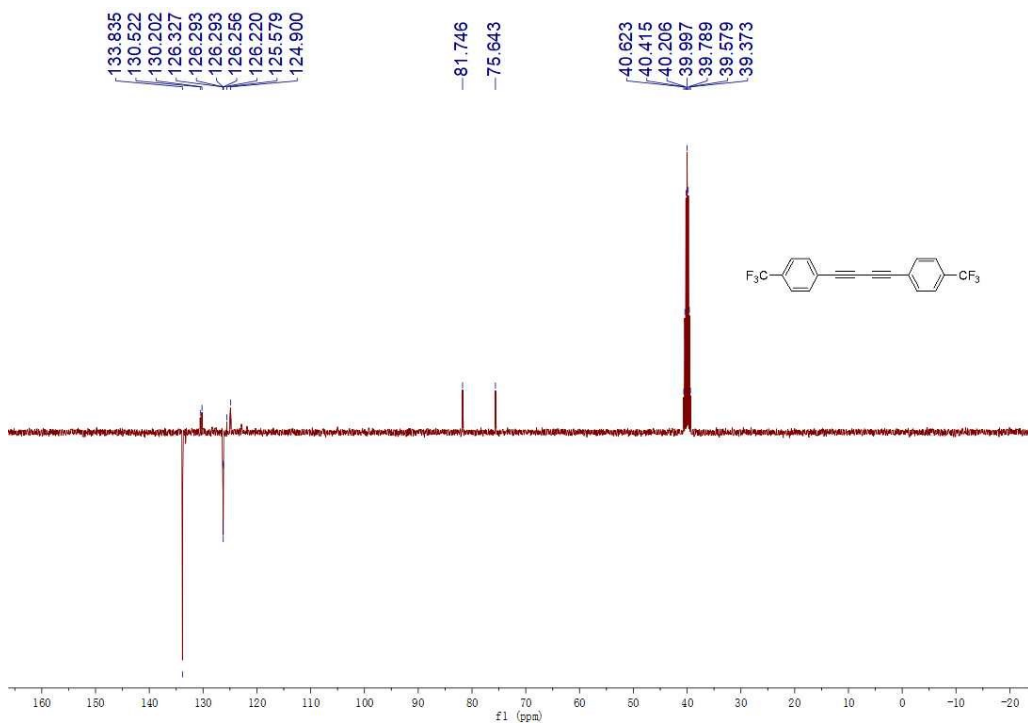

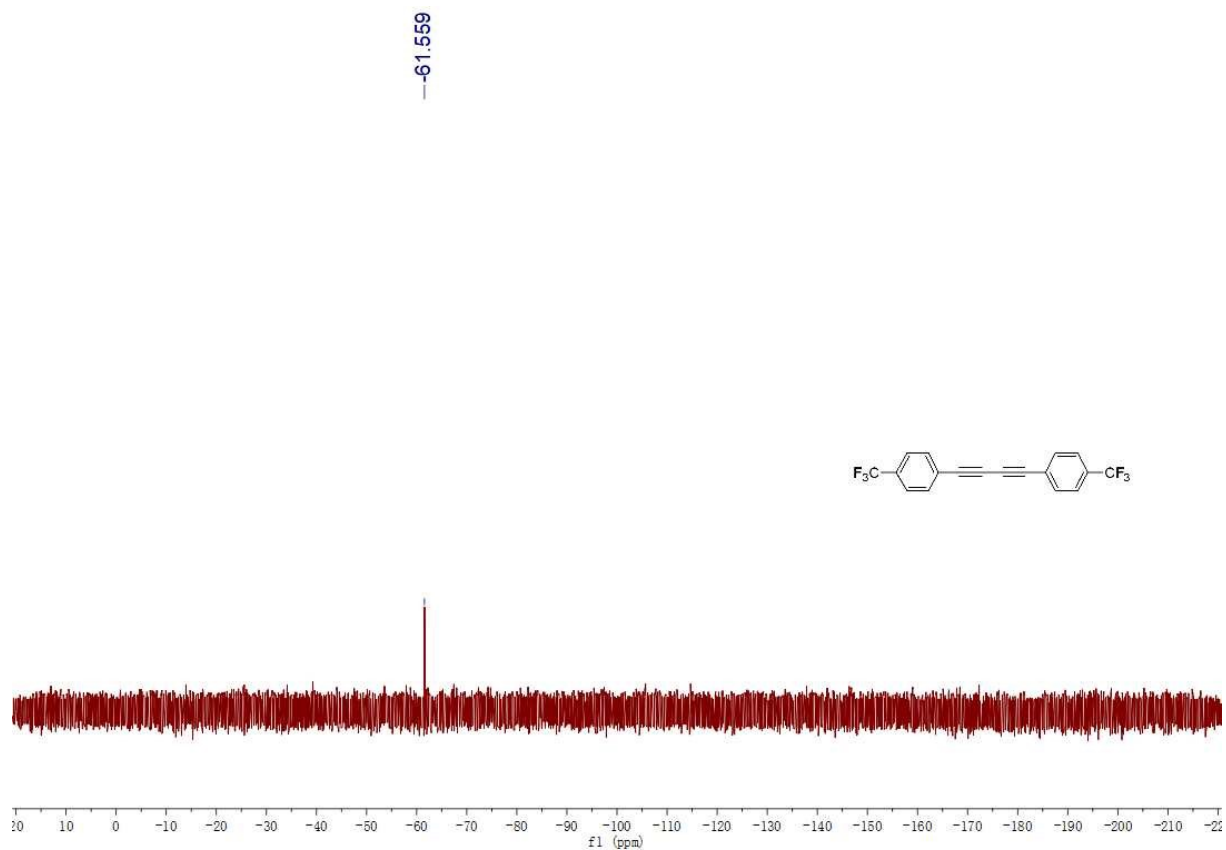

**Figure S30.**  $^1\text{H}$ ,  $^{13}\text{C}$  and  $^{19}\text{F}$  NMR spectra of 1,4-bis(4-(trifluoromethyl)phenyl)buta-1,3-diyne (**3h**).  $^1\text{H}$  NMR (400 MHz,  $\text{DMSO-}d_6$ ):  $\delta$  7.86, 7.82 (dd,  $J = 8.4, 8.4$  Hz, 8H).  $^{13}\text{C}$  NMR (100 MHz,  $\text{DMSO-}d_6$ ):  $\delta$  133.8, 130.5, 130.2, 126.3 (q,  $J = 3.7$  Hz), 81.7, 75.6.  $^{19}\text{F}$  NMR (376 MHz,  $\text{DMSO-}d_6$ ):  $\delta$  -61.56

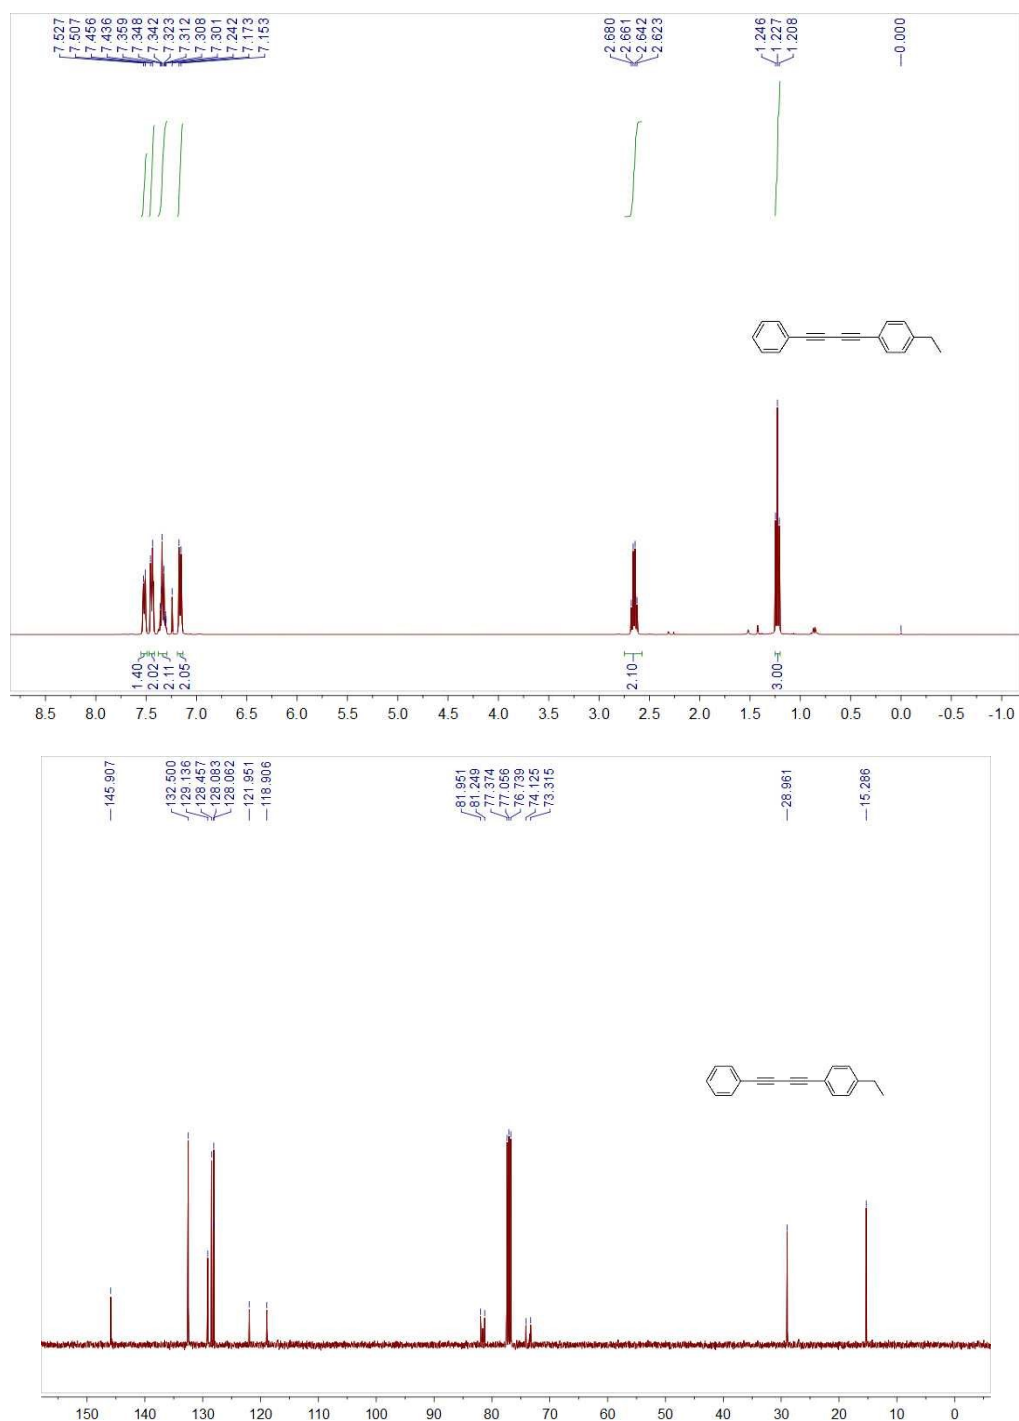

**Figure S31.**  $^1\text{H}$  and  $^{13}\text{C}$  NMR spectra of 1-ethyl-4-(phenylbuta-1,3-diyne-1-yl)benzene (**4a**).

$^1\text{H}$  NMR (400 MHz,  $\text{CDCl}_3$ ):  $\delta$  7.52 (d,  $J = 8.0$  Hz, 1H), 7.45 (d,  $J = 8.0$  Hz, 2H), 7.36-7.30 (m, 2H), 7.16 (d,  $J = 8.0$  Hz, 2H), 2.65 (q,  $J = 7.6$  Hz, 2H), 1.23 (t,  $J = 7.6$  Hz, 3H).  $^{13}\text{C}$  NMR (100 MHz,  $\text{CDCl}_3$ ):  $\delta$  145.9, 132.5, 129.1, 128.5, 128.1, 128.1, 122.0, 118.9, 82.0, 81.2, 74.1, 73.3, 29.0, 15.3.

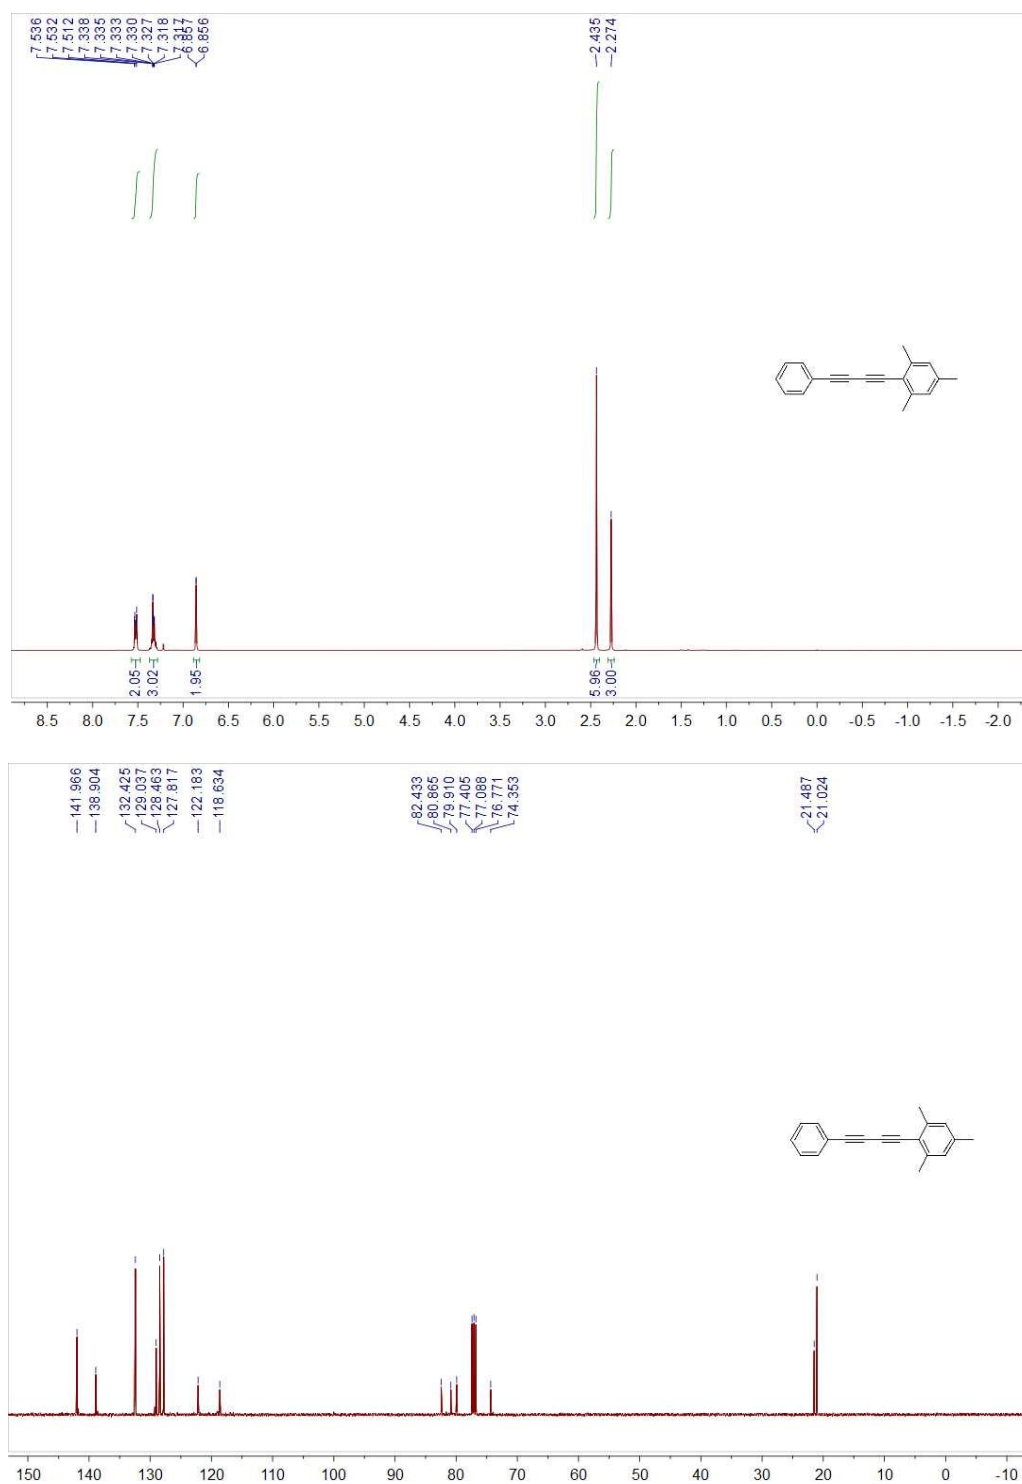

**Figure S32.** <sup>1</sup>H and <sup>13</sup>C NMR spectra of 1,3,5-trimethyl-2-(phenylbuta-1,3-diyne-1-yl)benzene (**4b**). <sup>1</sup>H NMR (400 MHz, CDCl<sub>3</sub>): δ 7.54-7.51 (m, 2H), 7.34-7.32 (m, 2H), 6.86 (s, 2H), 2.44 (s, 6H), 2.27 (s, 3H). <sup>13</sup>C NMR (100 MHz, CDCl<sub>3</sub>): δ 142.0, 138.9, 132.4, 129.0, 128.5, 127.8, 122.2, 118.6, 82.4, 80.9, 79.9, 74.4, 21.5, 21.0.

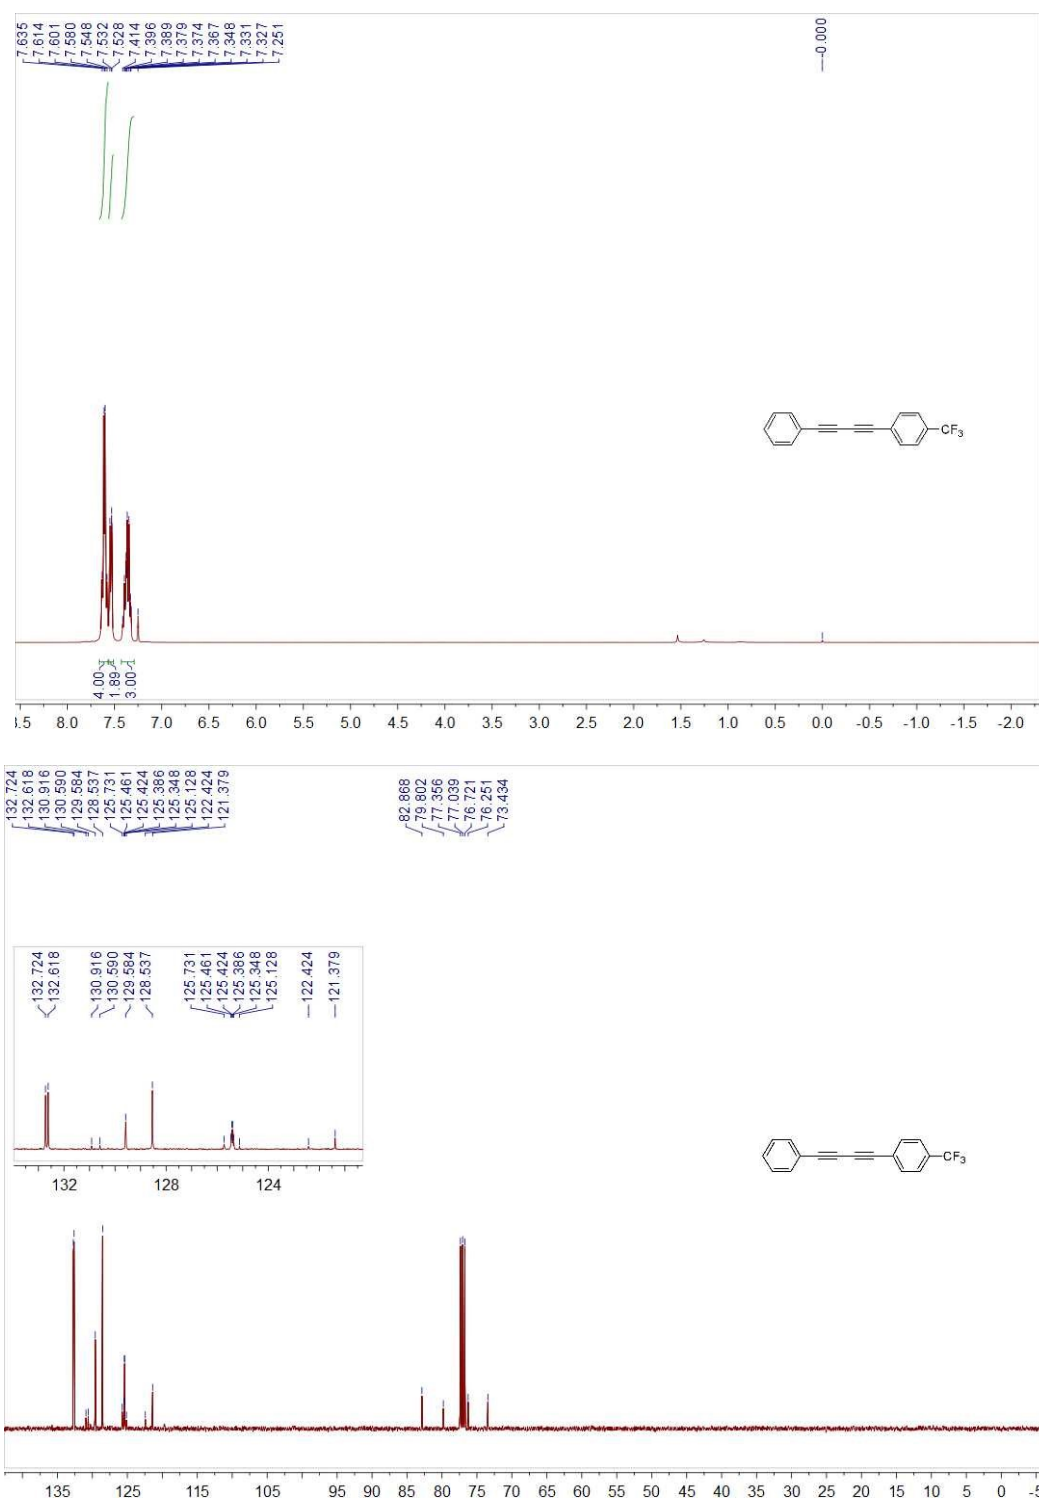

**Figure S33.** <sup>1</sup>H and <sup>13</sup>C NMR spectra of 1-(phenylbuta-1,3-diyne-1-yl)-4-(trifluoromethyl)benzene (**4c**). <sup>1</sup>H NMR (400 MHz, CDCl<sub>3</sub>): δ 7.64-7.53 (m, 6H), 7.40-7.33 (m, 3H). <sup>13</sup>C NMR (100 MHz, CDCl<sub>3</sub>): δ 133.7, 132.6, 130.9, 130.6, 129.6, 128.5, 125.7, 125.4 (q, J = 3.8 Hz), 125.1, 122.4, 121.4, 82.9, 79.8, 76.3, 73.4 .

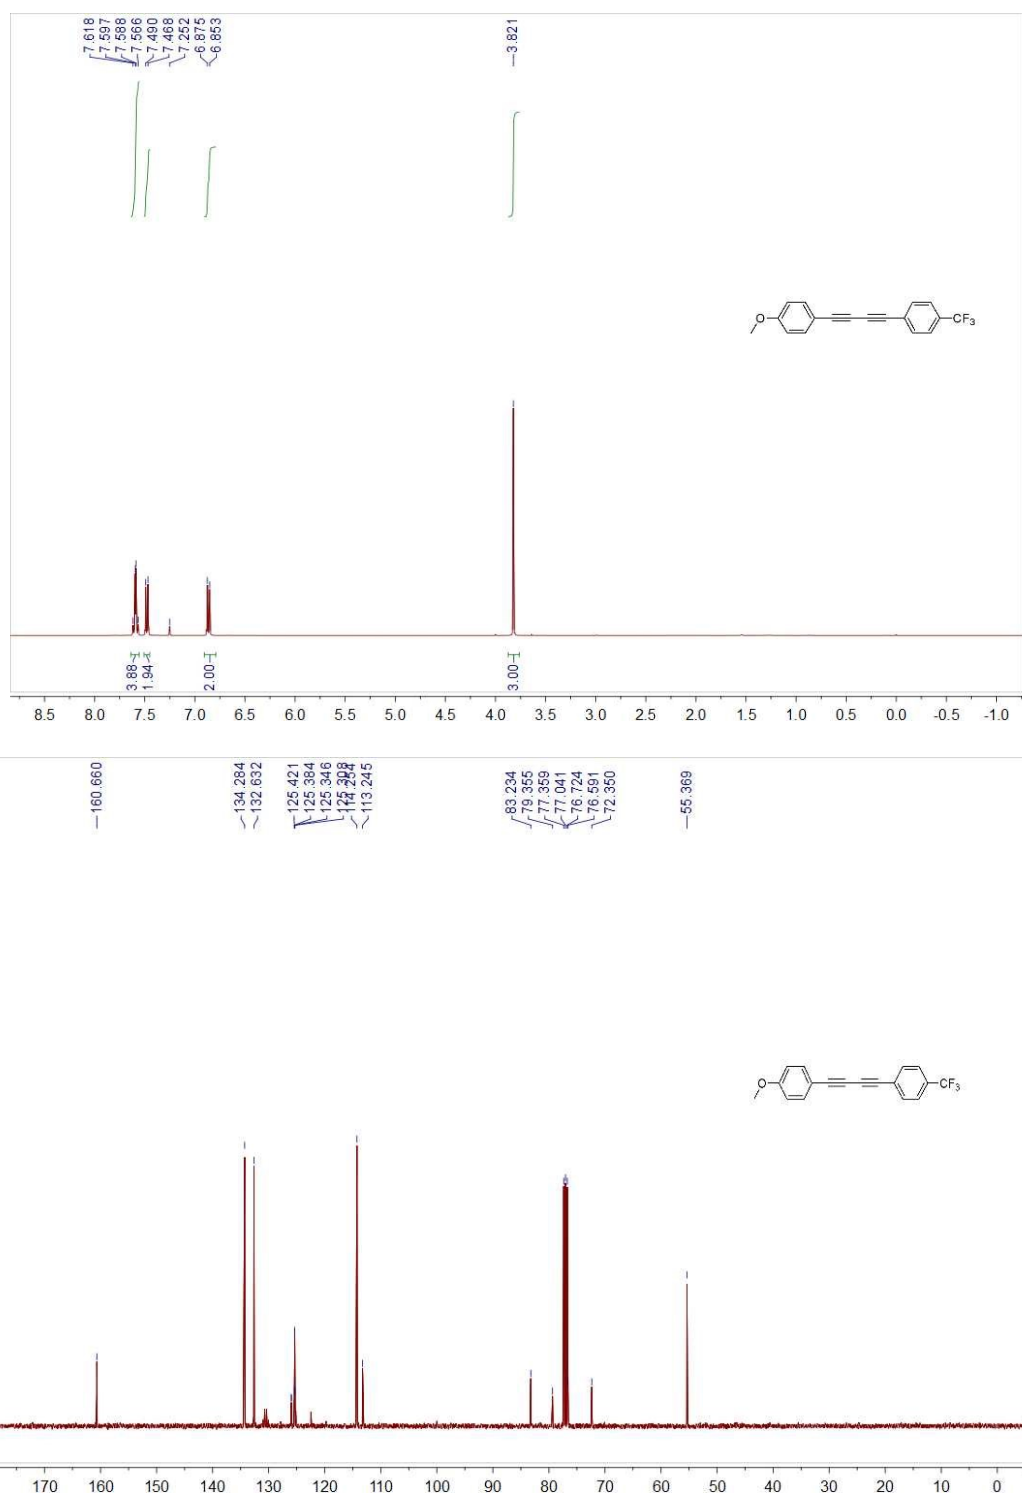

**Figure S34.**  $^1\text{H}$  and  $^{13}\text{C}$  NMR spectra of 1-methoxy-4-((4-(trifluoromethyl)phenyl)buta-1,3-diyne-1-yl)benzene (**4d**).  $^1\text{H}$  NMR (400 MHz,  $\text{CDCl}_3$ ):  $\delta$  7.61, 7.58 (dd,  $J = 8.4, 8.8$  Hz, 4H), 7.48 (d,  $J = 8.8$  Hz, 2H), 6.86 (d,  $J = 8.8$  Hz, 2H), 3.82 (s, 3H).  $^{13}\text{C}$  NMR (100 MHz,  $\text{CDCl}_3$ ):  $\delta$  160.7, 134.3, 132.6, 130.5 (q,  $J = 32.5$  Hz), 126.0, 125.4 (q,  $J = 3.8$  Hz), 123.8, 114.3, 113.2, 83.2, 79.4, 76.6, 72.4, 55.4.



**Table S1.** The ICP-OES results of Cu in the samples of Cu@C<sub>2</sub>N

|                    |                        | <b>Cu (mg·Kg<sup>-1</sup>)</b> | <b>Cu wt%</b> |
|--------------------|------------------------|--------------------------------|---------------|
| Before five cycles |                        | 65100.0                        | 6.51%         |
| After five cycles  | Hydration Reaction     | 65163.6                        | 6.51%         |
|                    | Homo-coupling Reaction | 60938.3                        | 6.09%         |

**Table S2.** Optimization of reaction conditions for the hetero-coupling.<sup>a,b</sup>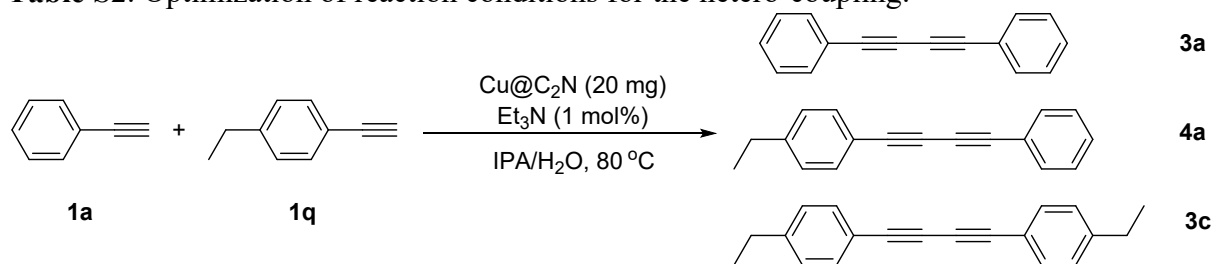

| Entry          | <b>1a</b><br>(mmol) | <b>1q</b><br>(mmol) | <b>3a</b><br>yield% | <b>4a</b><br>yield% | <b>3c</b><br>yield% |
|----------------|---------------------|---------------------|---------------------|---------------------|---------------------|
| 1 <sup>c</sup> | 0.1                 | 0.1                 | 48                  | trace               | 42                  |
| 2              | 0.1                 | 0.1                 | 42                  | 12                  | 35                  |
| 3              | 0.1                 | 0.2                 | 32                  | 35                  | 27                  |
| 4              | 0.1                 | 0.3                 | 25                  | 58                  | trace               |

<sup>a</sup>Reaction conditions: The mixture of **1a** (0.1 mmol), **1q** (0.1-0.3 mmol) and catalysts (20 mg) with 1 mol% Et<sub>3</sub>N was stirred at 80 °C in solvent (1 mL) under an air atmosphere. <sup>b</sup>Isolated yields. <sup>c</sup>H<sub>2</sub>O as solvent.

Table S3 Mechanistic studies of hydration of alkynes.<sup>a,b</sup>

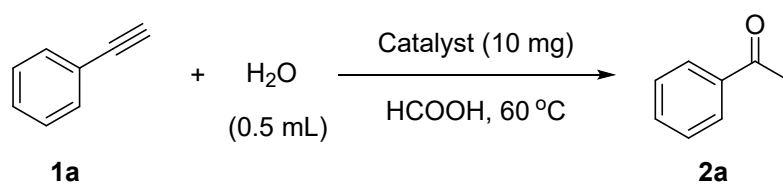

| Entry | Catalyst                           | <b>1a</b>   | <b>2a</b>         |
|-------|------------------------------------|-------------|-------------------|
|       |                                    | Conversion% | Yield%            |
| 1     | -                                  | -           | n.r. <sup>c</sup> |
| 2     | C <sub>2</sub> N                   | -           | n.r.              |
| 3     | CuCl <sub>2</sub>                  | -           | n.r.              |
| 4     | CuI                                | -           | n.r.              |
| 5     | C <sub>2</sub> N+CuCl <sub>2</sub> | 30          | 26                |
| 6     | C <sub>2</sub> N+CuI               | -           | n.r.              |

<sup>a</sup>Reaction conditions: The mixture of **1a** (0.5 mmol) and catalysts (10 mg) was stirred at 60 °C in HCOOH (2 mL) under an air atmosphere. <sup>b</sup>Isolated yields. <sup>c</sup>n.r. = no reaction.

Table S4 Mechanistic studies of Glaser-Hay reaction.<sup>a,b</sup>

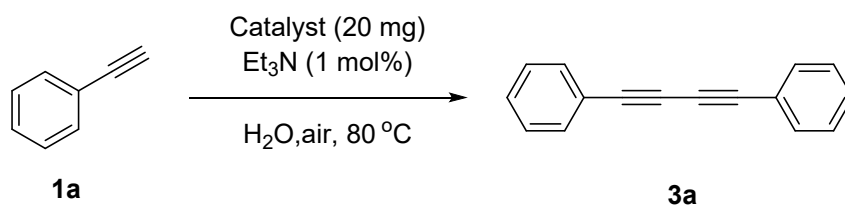

| Entry | Catalyst                           | <b>1a</b>   | <b>3a</b>         |
|-------|------------------------------------|-------------|-------------------|
|       |                                    | Conversion% | Yield%            |
| 1     | -                                  | -           | n.r. <sup>c</sup> |
| 2     | C <sub>2</sub> N                   | -           | n.r.              |
| 3     | CuCl <sub>2</sub>                  | 13          | 11                |
| 4     | CuI                                | 17          | 15                |
| 5     | C <sub>2</sub> N+CuCl <sub>2</sub> | 16          | 13                |
| 6     | C <sub>2</sub> N+CuI               | 22          | 18                |

<sup>a</sup>Reaction conditions: The mixture of **1a** (0.5 mmol) and catalysts (20 mg) was stirred at 80 °C in H<sub>2</sub>O (1 mL) with 1mol% Et<sub>3</sub>N under an air atmosphere. <sup>b</sup>Isolated yields. <sup>c</sup>n.r. = no reaction.
